# Supplementary material for: Madurastatins with Imidazolidinone Rings: Natural Products or Side-Reaction Products from Extraction Solvents?
Source: MDPI journal article supplement (doi:10.3390/ijms25010301), 2023-12-25
Supplement: s1 [file s1]

Supplementary information for

## Madurastatins with Imidazolidinone Rings: Natural Products or Side-Reaction Products from Extraction Solvents?

Mercedes Pérez-Bonilla <sup>1,\*</sup>, Marina Sánchez-Hidalgo <sup>1</sup>, Ignacio González <sup>1</sup>, Daniel Oves-Costales <sup>1</sup>, Jesús Martín <sup>1</sup>, José Murillo-Alba <sup>1</sup>, José R. Tormo <sup>1</sup>, Ahreum Cho <sup>2</sup>, Soo-Young Byun <sup>2</sup>, Joo-Hwan No <sup>2</sup>, David Shum <sup>2</sup>, Jean-Robert Ioset <sup>3</sup>, Olga Genilloud <sup>1</sup> and Fernando Reyes <sup>1,\*</sup>

<sup>1</sup> Fundación MEDINA, Avda. del Conocimiento 34, 18016 Granada, Spain; marina.sanchez@medinaandalucia.es (M.S.-H.); ignacio.gonzalez@medinaandalucia.es (I.G.); daniel.oves@medinaandalucia.es (D.O.-C.); jesus.martin@medinaandalucia.es (J.M.); jose.murillo@medinaandalucia.es (J.M.-A.); ruben.tormo@medinaandalucia.es (J.R.T.); olga.genilloud@medinaandalucia.es (O.G.)

<sup>2</sup> Institut Pasteur Korea, 16, Daewangpangyo-ro 712 beon-gil, Bundang-gu, Seongnam-si 13488, Gyeonggi-do, Republic of Korea; ahreum.cho@ip-korea.org (A.C.); sooyoung.byun@ip-korea.org (S.-Y.B.); joohwan.no@ip-korea.org (J.-H.N.); david.shum@ip-korea.org (D.S.)

<sup>3</sup> Drugs for Neglected Diseases Initiative, 15 Chemin Camille-Vidart, 1202 Geneva, Switzerland; jrioset@dndi.org

\* Correspondence: mercedes.perez@medinaandalucia.es (M.P.-B.); fernando.reyes@medinaandalucia.es (F.R.); Tel.: +34-958993965 (ext. 7006) (F.R.)

## Supporting Information Table of Contents

| Contents                                                                                                                                                           | Page  |
|--------------------------------------------------------------------------------------------------------------------------------------------------------------------|-------|
| <b>Figure S1.</b> Chromatographic profiles at 210 nm of the D-FDVA adducts of serine references for the compound <b>2</b> .....                                    | 3     |
| <b>Figure S2.</b> Chromatographic profiles at 210 nm of the single D-FDVA adducts of ornithine references for the compound <b>2</b> .....                          | 4     |
| <b>Figure S3.</b> Chromatographic profiles at 210 nm of the D-FDVA adducts for the compound <b>2</b> .....                                                         | 5     |
| <b>Figure S4.</b> Chromatographic profiles at 210 nm of the L-FDVA adducts for the compound <b>2</b> .....                                                         | 5     |
| <b>Figure S5.</b> Chromatographic profiles at 210 nm of the D-FDVA adducts of serine references for the compounds <b>1</b> , <b>3</b> and <b>4</b> .....           | 6     |
| <b>Figure S6.</b> Chromatographic profiles at 210 nm of the single D-FDVA adducts of ornithine references for the compounds <b>1</b> , <b>3</b> and <b>4</b> ..... | 6     |
| <b>Figure S7.</b> Chromatographic profiles at 210 nm of the D-FDVA adducts for the compound <b>1</b> .....                                                         | 7     |
| <b>Figure S8.</b> Ion extraction of serine-D-FDVA adducts in compound <b>1</b> .....                                                                               | 7     |
| <b>Figure S9.</b> Ion extraction of the double ornithine-D-FDVA adducts in compound <b>1</b> .....                                                                 | 8     |
| <b>Figure S10.</b> Ion extraction of the double <i>N</i> α-methyl-ornithine-D-FDVA adducts in compound <b>1</b> .....                                              | 9     |
| <b>Figure S11.</b> Chromatographic profiles at 210 nm of the D-FDVA adducts for the compound <b>3</b> .....                                                        | 10    |
| <b>Figure S12.</b> Ion extraction of serine-D-FDVA adducts in compound <b>3</b> .....                                                                              | 10    |
| <b>Figure S13.</b> Ion extraction of the double ornithine-D-FDVA adducts in compound <b>3</b> .....                                                                | 11    |
| <b>Figure S14.</b> Ion extraction of the double <i>N</i> α-methyl-ornithine-D-FDVA adducts in compound <b>3</b> .....                                              | 11    |
| <b>Figure S15.</b> Chromatographic profiles at 210 nm of the D-FDVA adducts for the compound <b>4</b> .....                                                        | 12    |
| <b>Figure S16.</b> Ion extraction of serine-D-FDVA adducts in compound <b>4</b> .....                                                                              | 12    |
| <b>Figure S17.</b> Ion extraction of the double ornithine-D-FDVA adducts in compound <b>4</b> .....                                                                | 13    |
| <b>Figure S18.</b> Ion extraction of the double <i>N</i> α-methyl-ornithine-D-FDVA adducts in compound <b>4</b> .....                                              | 13    |
| <b>Table S1.</b> ORFs present in the madurastatin BGC from <i>Actinomadura</i> sp.CA-135719.....                                                                   | 14-15 |
| <b>Figure S19.</b> Comparison of the NRPS genes from <i>mad</i> , <i>rene</i> , and <i>mds</i> clusters.....                                                       | 16    |
| <b>Figure S20.</b> Scheme of side reaction involved in dimethyl-labeling of peptides with formaldehyde.....                                                        | 16    |
| <b>Figure S21.</b> Scheme of the formation reaction to produce madurastatins H2 ( <b>2</b> ) and D2 ( <b>5</b> ).....                                              | 17    |
| <b>Figure S22.</b> Scheme of the formation reaction to produce 33-epimadurastatin D1 ( <b>3</b> ) and madurastatin D1 ( <b>4</b> ).....                            | 17    |
| <b>Figure S23.</b> <sup>1</sup> H-NMR (500 MHz, dimethyl sulfoxide- <i>d</i> <sub>6</sub> ) spectrum of madurastatin H2 ( <b>2</b> ).....                          | 18    |
| <b>Figure S24.</b> <sup>13</sup> C-NMR (125 MHz, dimethyl sulfoxide- <i>d</i> <sub>6</sub> ) spectrum of madurastatin H2 ( <b>2</b> ).....                         | 19    |
| <b>Figure S25.</b> HSQC (dimethyl sulfoxide- <i>d</i> <sub>6</sub> ) spectrum of madurastatin H2 ( <b>2</b> ).....                                                 | 20    |
| <b>Figure S26.</b> HMBC (dimethyl sulfoxide- <i>d</i> <sub>6</sub> ) spectrum of madurastatin H2 ( <b>2</b> ).....                                                 | 21    |
| <b>Figure S27.</b> COSY (dimethyl sulfoxide- <i>d</i> <sub>6</sub> ) spectrum of madurastatin H2 ( <b>2</b> ).....                                                 | 22    |
| <b>Figure S28.</b> TOCSY (dimethyl sulfoxide- <i>d</i> <sub>6</sub> ) spectrum of madurastatin H2 ( <b>2</b> ).....                                                | 23    |
| <b>Figure S29.</b> <sup>1</sup> H-NMR (500 MHz, dimethyl sulfoxide- <i>d</i> <sub>6</sub> ) spectrum of 33-epi-madurastatin D1 ( <b>3</b> ).....                   | 24    |
| <b>Figure S30.</b> HSQC (dimethyl sulfoxide- <i>d</i> <sub>6</sub> ) spectrum of 33-epi-madurastatin D1 ( <b>3</b> ).....                                          | 25    |
| <b>Figure S31.</b> <sup>1</sup> H-NMR (500 MHz, dimethyl sulfoxide- <i>d</i> <sub>6</sub> ) spectrum of madurastatin D1 ( <b>4</b> ).....                          | 26    |
| <b>Figure S32.</b> HSQC (dimethyl sulfoxide- <i>d</i> <sub>6</sub> ) spectrum of madurastatin D1 ( <b>4</b> ).....                                                 | 27    |
| <b>Figure S33.</b> HRMS spectrum of madurastatin H2 ( <b>2</b> ).....                                                                                              | 28    |
| <b>Figure S34.</b> HRMS spectrum of 33- <i>epi</i> -madurastatin D1 ( <b>3</b> ).....                                                                              | 28    |

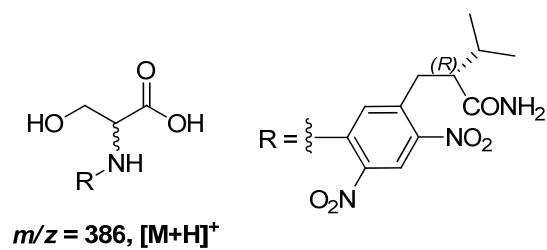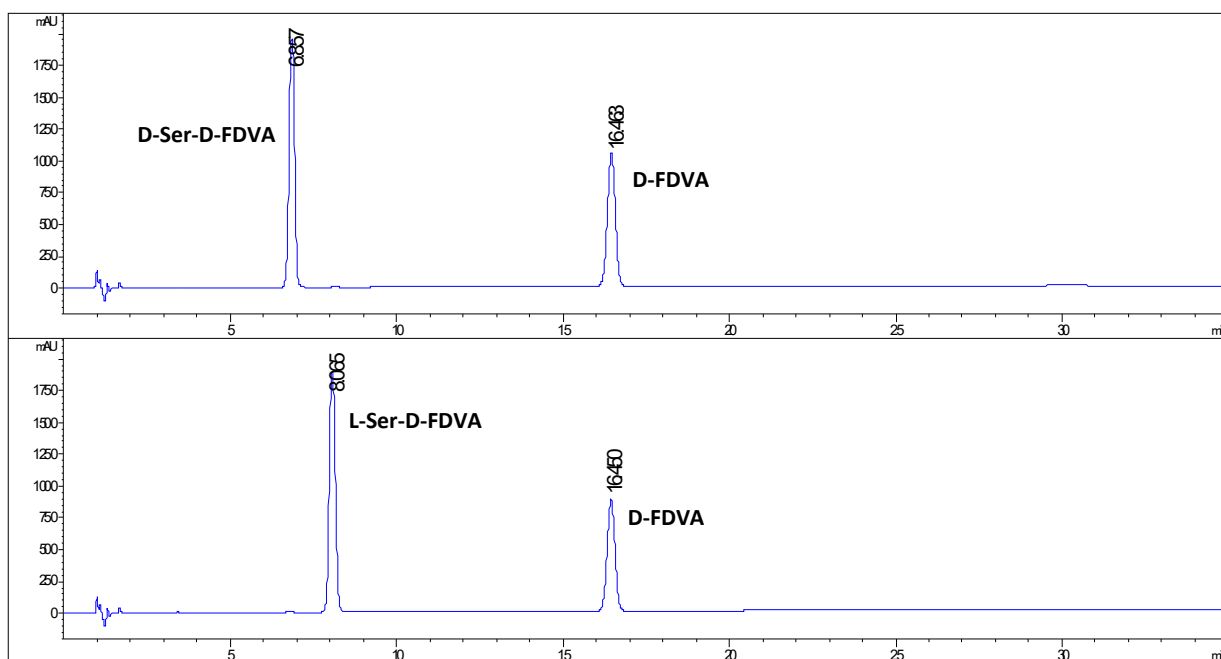

**Figure S1.** Chromatographic profiles at 210 nm of the D-FDVA adducts of serine references:  $[M+H]^+ = 386$ ,  $[M+Na]^+ = 408$ ; D-serine (RT = 6.857 min) and L-serine (RT = 8.065 min) for the compound **2**.

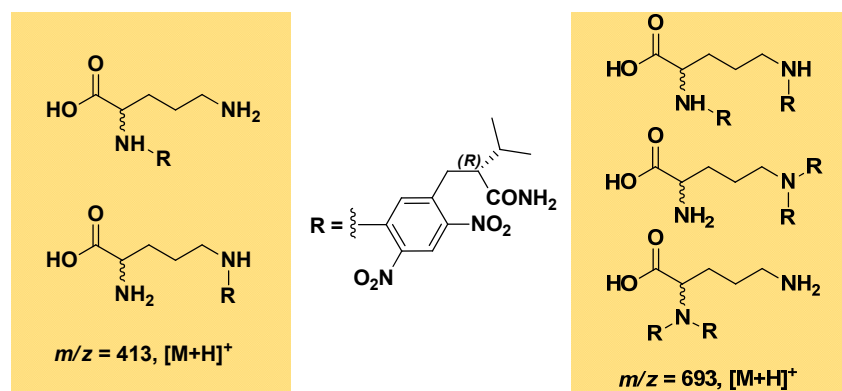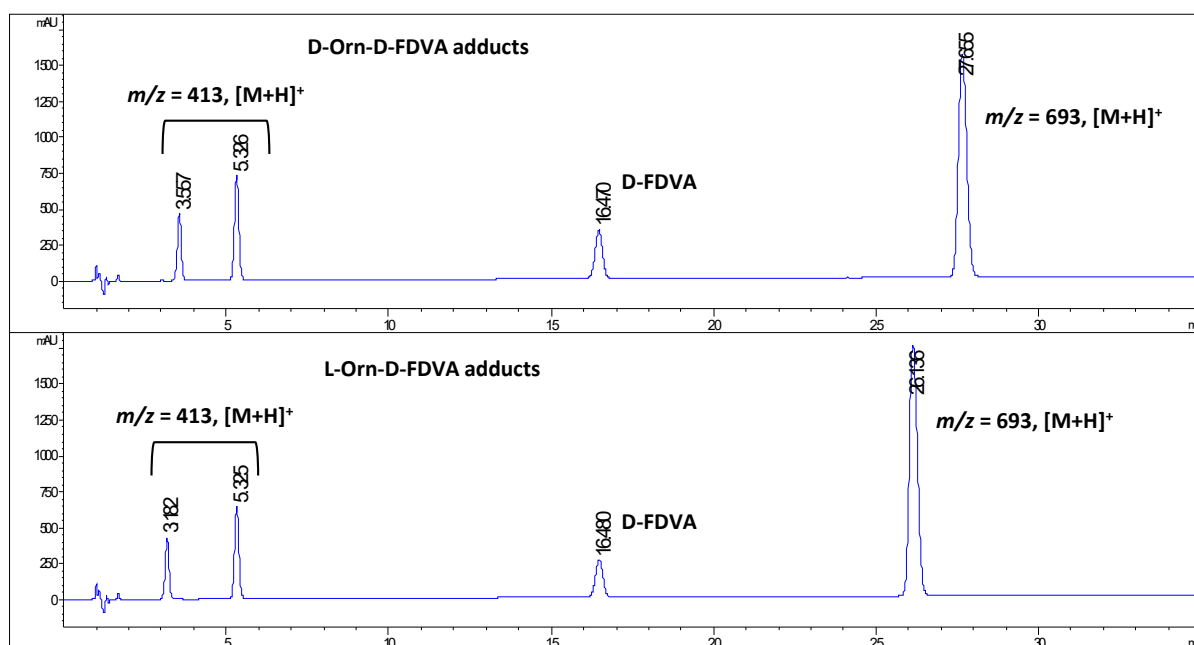

**Figure S2.** Chromatographic profiles at 210 nm of the single D-FDVA adducts of ornithine references: D-ornithine (RT = 3.557 and 5.326 min) and L-ornithine (RT = 3.182 and 5.325 min). Double D-FDVA adducts of ornithine references: D-ornithine (RT = 27.655 min) and L-ornithine (RT = 26.136 min) for the compound **2**.

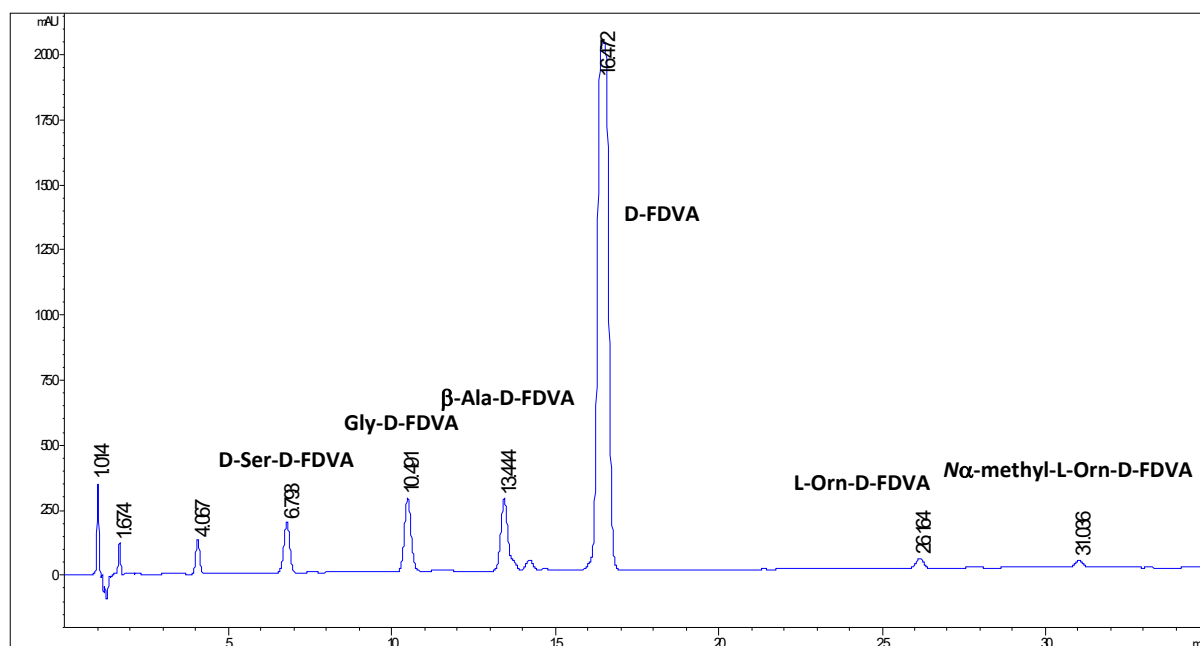

**Figure S3.** Chromatographic profiles at 210 nm of the D-FDVA adducts for the compound **2**: D-serine (RT = 6.793 min,  $m/z$  408 [M+Na]<sup>+</sup>,  $m/z$  386 [M+H]<sup>+</sup>), glycine (RT = 10.491 min,  $m/z$  378 [M+Na]<sup>+</sup>,  $m/z$  356 [M+H]<sup>+</sup>), β-alanine (RT = 13.444 min,  $m/z$  392 [M+Na]<sup>+</sup>,  $m/z$  370 [M+H]<sup>+</sup>), double D-FDVA adduct of L-ornithine (RT = 26.164 min,  $m/z$  715 [M+Na]<sup>+</sup>,  $m/z$  693 [M+H]<sup>+</sup>), double D-FDVA adduct of Nα-methyl-L-ornithine (RT = 31.036 min,  $m/z$  729 [M+Na]<sup>+</sup>,  $m/z$  707 [M+H]<sup>+</sup>).

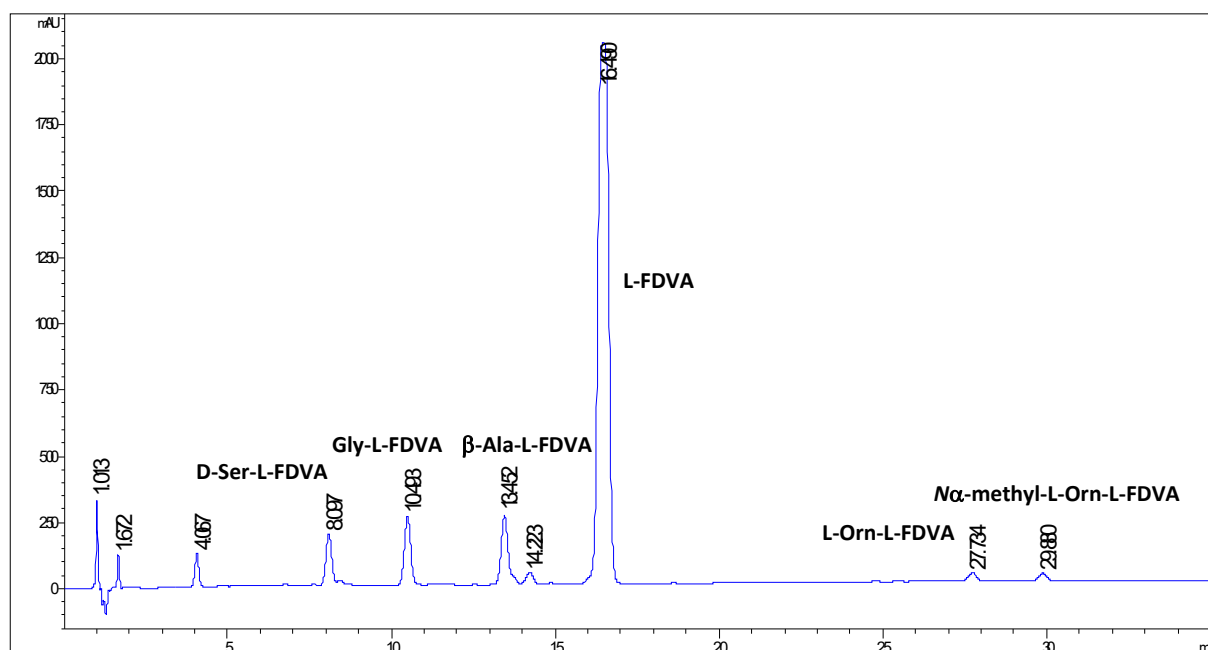

**Figure S4.** Chromatographic profiles at 210 nm of the L-FDVA adducts for the compound **2**: D-serine (RT = 8.097 min,  $m/z$  408 [M+Na]<sup>+</sup>,  $m/z$  386 [M+H]<sup>+</sup>), glycine (RT = 10.493 min,  $m/z$  378 [M+Na]<sup>+</sup>,  $m/z$  356 [M+H]<sup>+</sup>), β-alanine (RT = 13.452 min,  $m/z$  392 [M+Na]<sup>+</sup>,  $m/z$  370 [M+H]<sup>+</sup>), double L-FDVA adduct of L-ornithine (RT = 27.734 min,  $m/z$  715 [M+Na]<sup>+</sup>,  $m/z$  693 [M+H]<sup>+</sup>), double L-FDVA adduct of Nα-methyl-L-ornithine (RT = 29.880 min,  $m/z$  729 [M+Na]<sup>+</sup>,  $m/z$  707 [M+H]<sup>+</sup>).

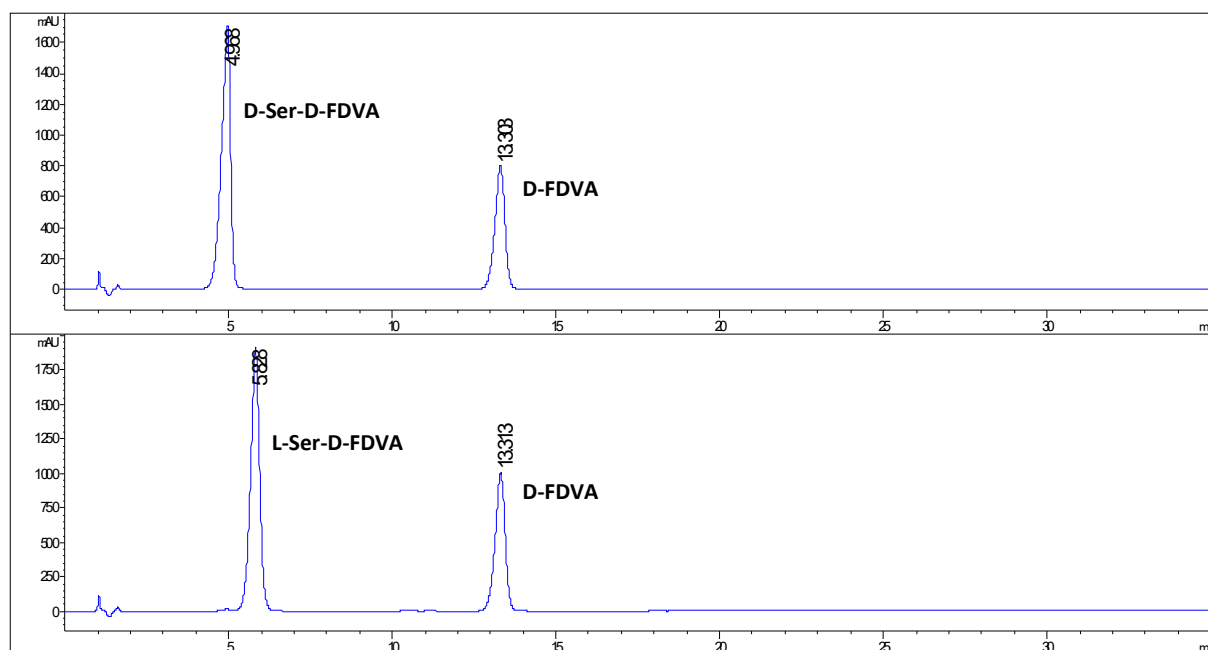

**Figure S5.** Chromatographic profiles at 210 nm of the D-FDVA adducts of serine references:  $[M+H]^+ = 386$ ,  $[M+Na]^+ = 408$ ; D-serine (RT = 4.968 min) and L-serine (RT = 5.828 min) for the compounds **1**, **3** and **4**.

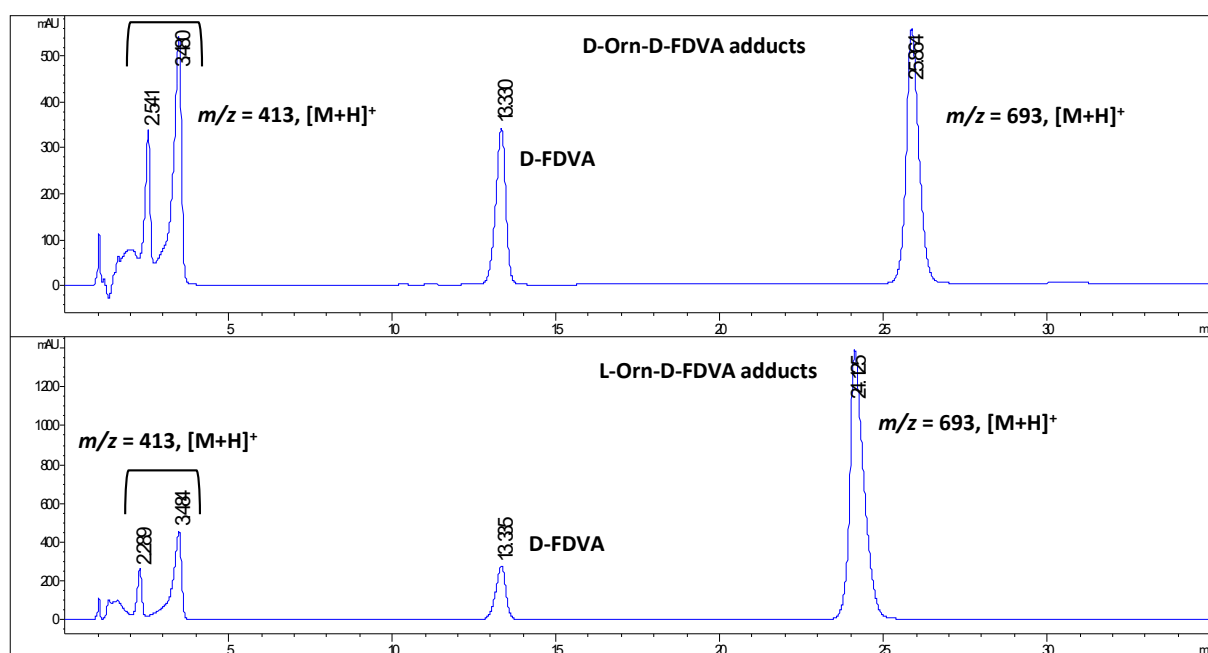

**Figure S6.** Chromatographic profiles at 210 nm of the single D-FDVA adducts of ornithine references: D-ornithine (RT = 2.541 and 3.480 min) and L-ornithine (RT = 2.289 and 3.484 min). Double D-FDVA adducts of ornithine references: D-ornithine (RT = 25.864 min) and L-ornithine (RT = 24.125 min) for the compounds **1**, **3** and **4**.

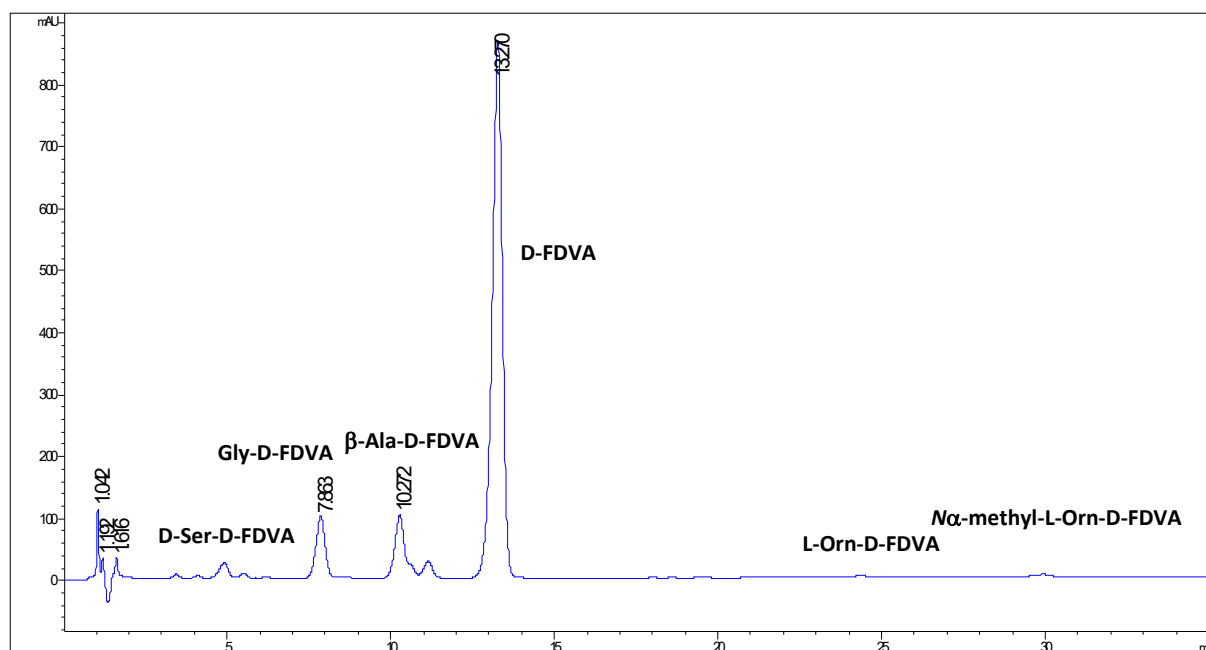

**Figure S7.** Chromatographic profiles at 210 nm of the D-FDVA adducts for the compound **1**: D-serine (RT = 4.940 min,  $m/z$  408 [M+Na]<sup>+</sup>,  $m/z$  386 [M+H]<sup>+</sup>), glycine (RT = 7.863 min,  $m/z$  378 [M+Na]<sup>+</sup>,  $m/z$  356 [M+H]<sup>+</sup>), β-alanine (RT = 10.272 min,  $m/z$  392 [M+Na]<sup>+</sup>,  $m/z$  370 [M+H]<sup>+</sup>), double D-FDVA adduct of L-ornithine (RT = 24.425 min,  $m/z$  715 [M+Na]<sup>+</sup>,  $m/z$  693 [M+H]<sup>+</sup>), double D-FDVA adduct of Nα-methyl-L-ornithine (RT = 29.972 min,  $m/z$  729 [M+Na]<sup>+</sup>,  $m/z$  707 [M+H]<sup>+</sup>).

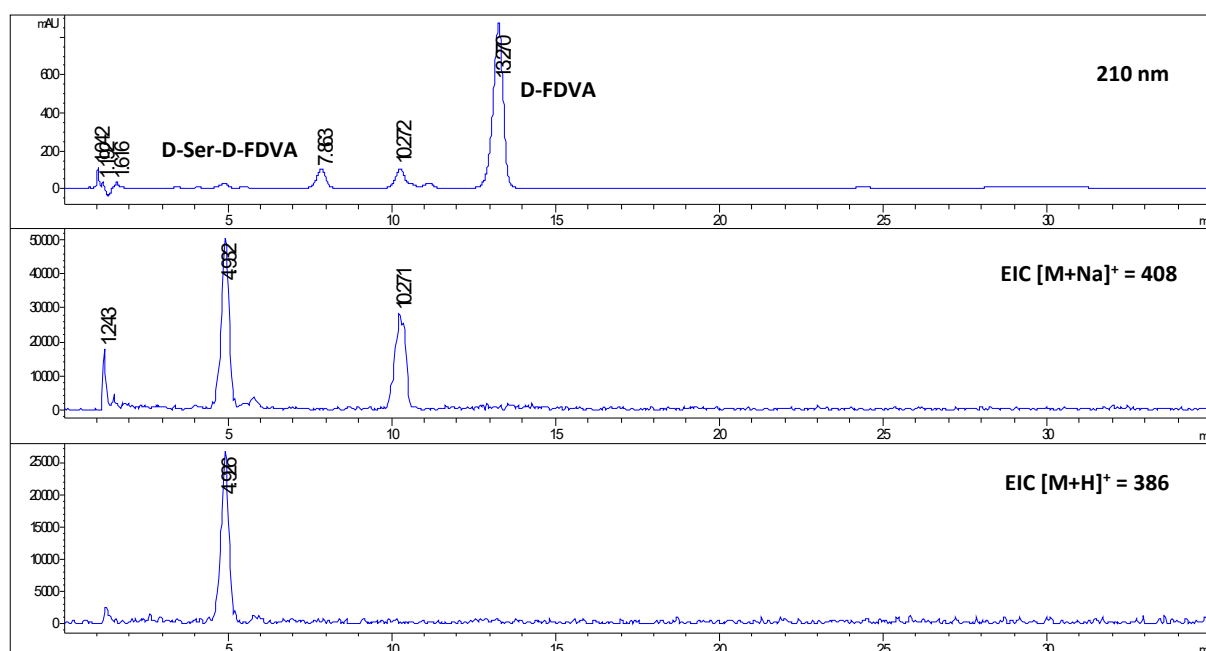

**Figure S8.** Ion extraction of serine-D-FDVA adducts in compound **1**: D-serine (RT = 4.932 min,  $m/z$  408 [M+Na]<sup>+</sup>,  $m/z$  386 [M+H]<sup>+</sup>).

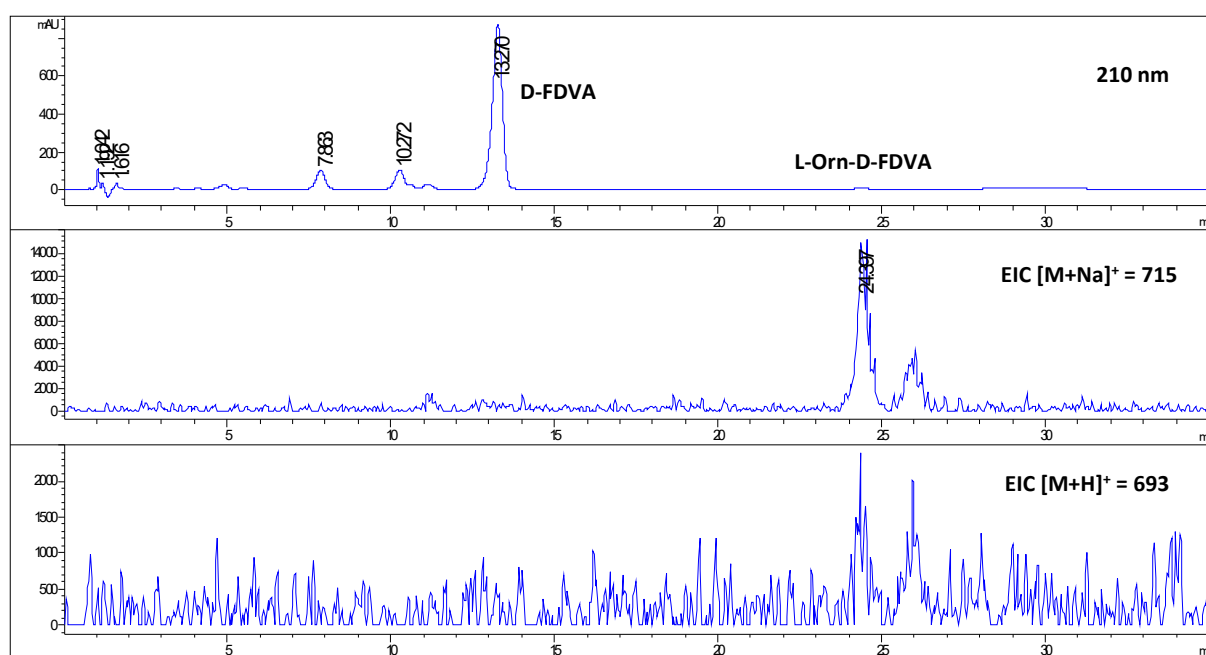

**Figure S9.** Ion extraction of the double ornithine-D-FDVA adducts in compound **1**: L-ornithine (RT = 24.397 min,  $m/z$  715  $[M+Na]^+$ ,  $m/z$  693  $[M+H]^+$ ).



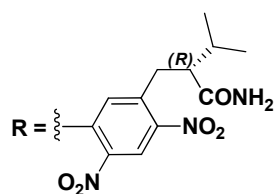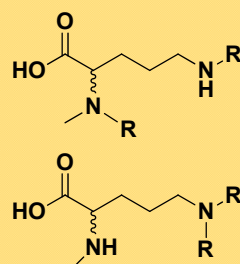

$m/z = 707, [\text{M}+\text{H}]^+$

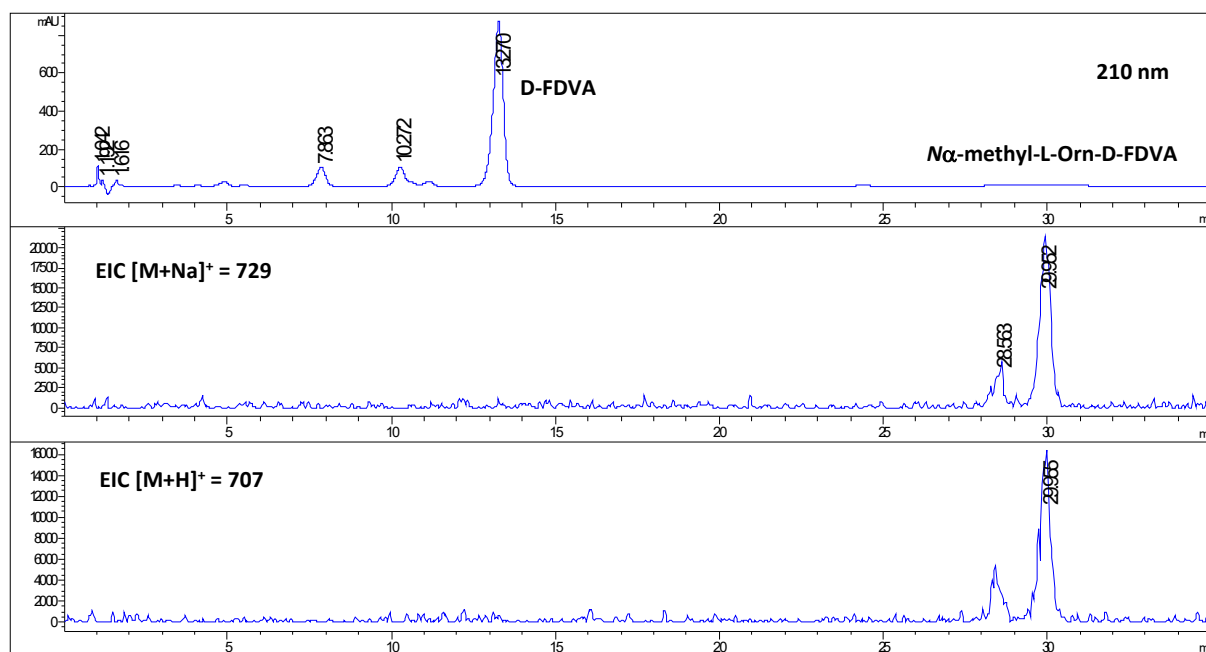

**Figure S10.** Ion extraction of the double  $\alpha$ -methyl-ornithine-D-FDVA adducts in compound 1:  $\alpha$ -methyl-L-ornithine (RT = 29.952 min,  $m/z$  729  $[\text{M}+\text{Na}]^+$ ,  $m/z$  707  $[\text{M}+\text{H}]^+$ ).

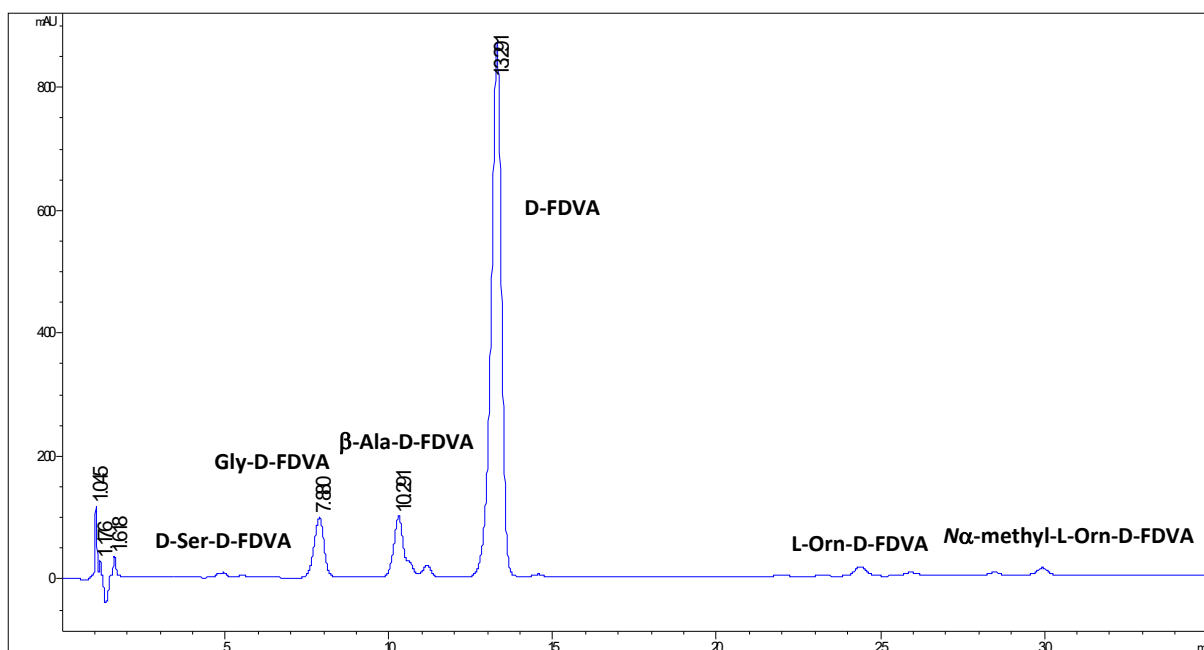

**Figure S11.** Chromatographic profiles at 210 nm of the D-FDVA adducts for the compound 3: D-serine (RT = 4.931 min,  $m/z$  408 [M+Na]<sup>+</sup>,  $m/z$  386 [M+H]<sup>+</sup>), glycine (RT = 7.880 min,  $m/z$  378 [M+Na]<sup>+</sup>,  $m/z$  356 [M+H]<sup>+</sup>), β-alanine (RT = 10.291 min,  $m/z$  392 [M+Na]<sup>+</sup>,  $m/z$  370 [M+H]<sup>+</sup>), double D-FDVA adduct of L-ornithine (RT = 24.405 min,  $m/z$  715 [M+Na]<sup>+</sup>,  $m/z$  693 [M+H]<sup>+</sup>), double D-FDVA adduct of Nα-methyl-L-ornithine (RT = 29.984 min,  $m/z$  729 [M+Na]<sup>+</sup>,  $m/z$  707 [M+H]<sup>+</sup>).

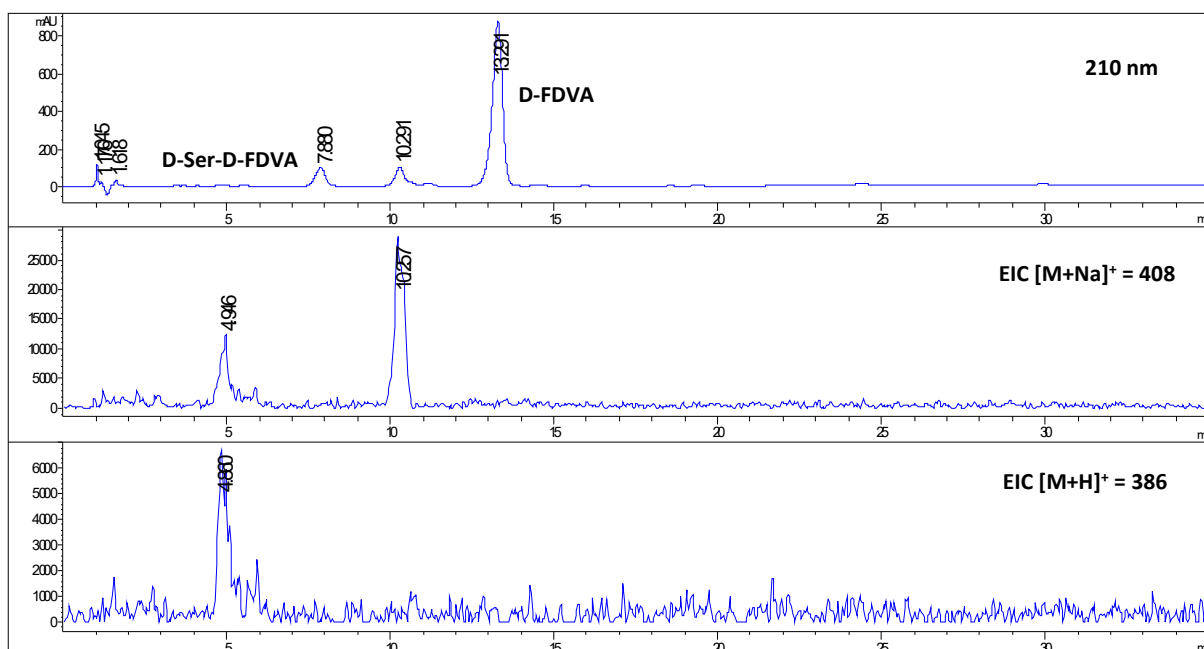

**Figure S12.** Ion extraction of serine-D-FDVA adducts in compound 3: D-serine (RT = 4.931 min,  $m/z$  408 [M+Na]<sup>+</sup>,  $m/z$  386 [M+H]<sup>+</sup>).

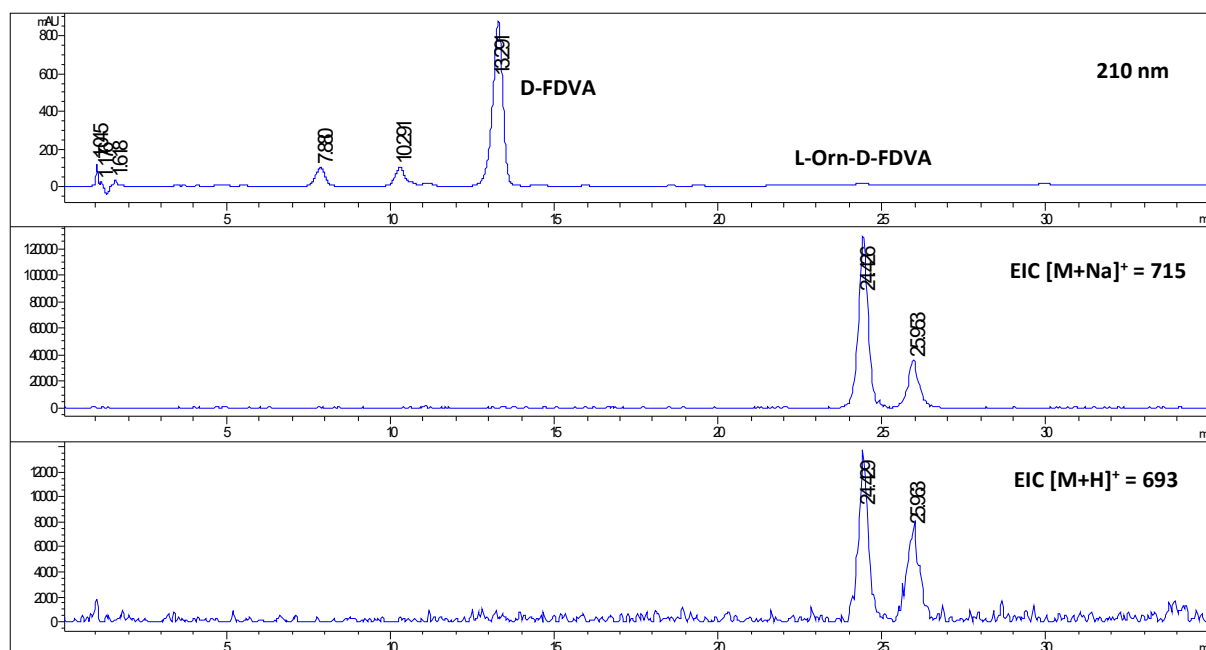

**Figure S13.** Ion extraction of the double ornithine-D-FDVA adducts in compound 3: L-ornithine (RT = 24.426 min,  $m/z$  715  $[M+Na]^+$ ,  $m/z$  693  $[M+H]^+$ ).

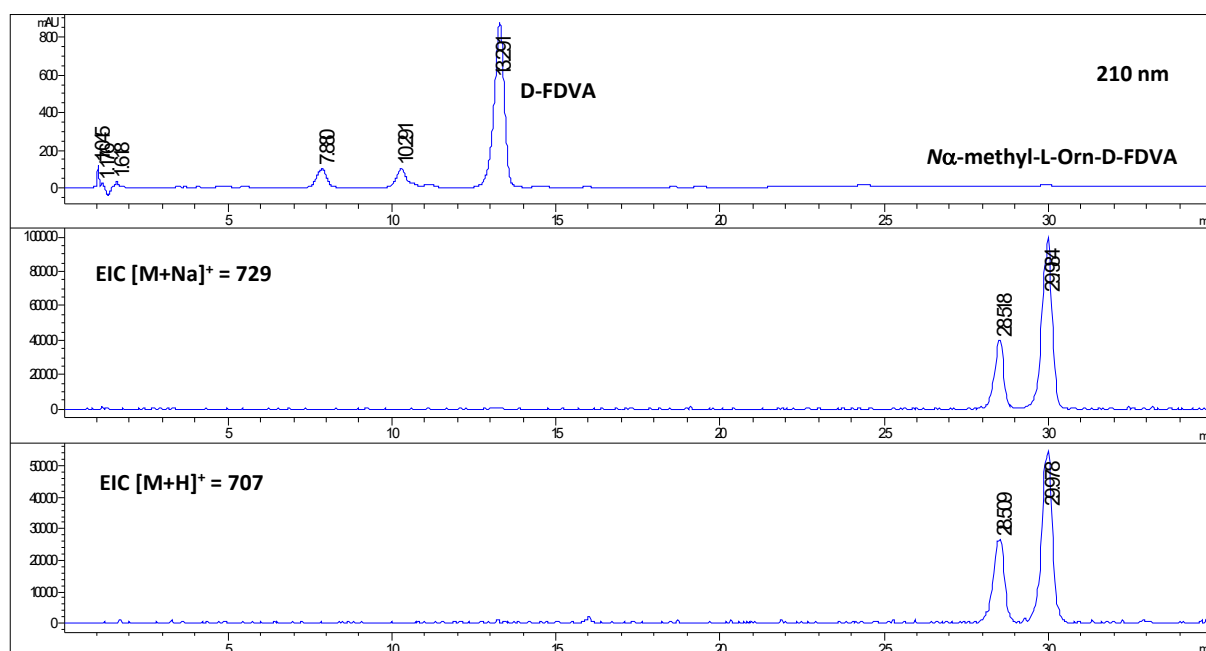

**Figure S14.** Ion extraction of the double  $N\alpha$ -methyl-ornithine-D-FDVA adducts in compound 3:  $N\alpha$ -methyl-L-ornithine (RT = 29.978 min,  $m/z$  729  $[M+Na]^+$ ,  $m/z$  707  $[M+H]^+$ ).

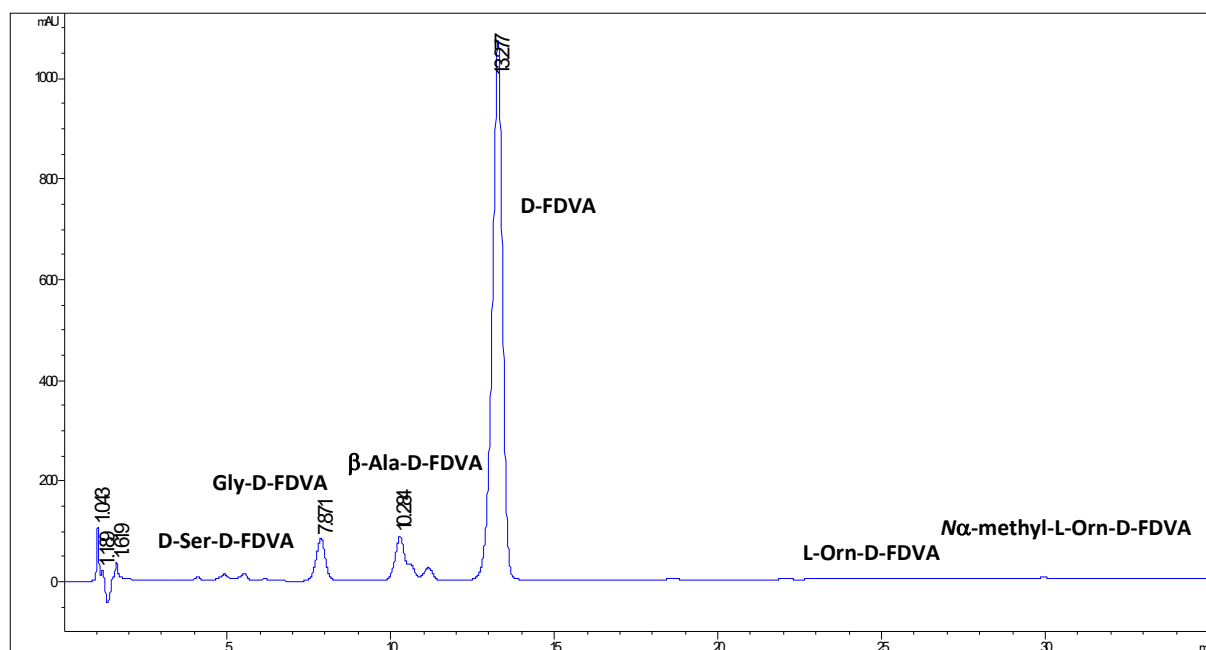

**Figure S15.** Chromatographic profiles at 210 nm of the D-FDVA adducts for the compound **4**: D-serine (RT = 4.911 min,  $m/z$  408 [M+Na]<sup>+</sup>,  $m/z$  386 [M+H]<sup>+</sup>), glycine (RT = 7.871 min,  $m/z$  378 [M+Na]<sup>+</sup>,  $m/z$  356 [M+H]<sup>+</sup>), β-alanine (RT = 10.272 min,  $m/z$  392 [M+Na]<sup>+</sup>,  $m/z$  370 [M+H]<sup>+</sup>), double D-FDVA adduct of L-ornithine (RT = 24.469 min,  $m/z$  715 [M+Na]<sup>+</sup>,  $m/z$  693 [M+H]<sup>+</sup>), double D-FDVA adduct of Nα-methyl-L-ornithine (RT = 29.857 min,  $m/z$  729 [M+Na]<sup>+</sup>,  $m/z$  707 [M+H]<sup>+</sup>).

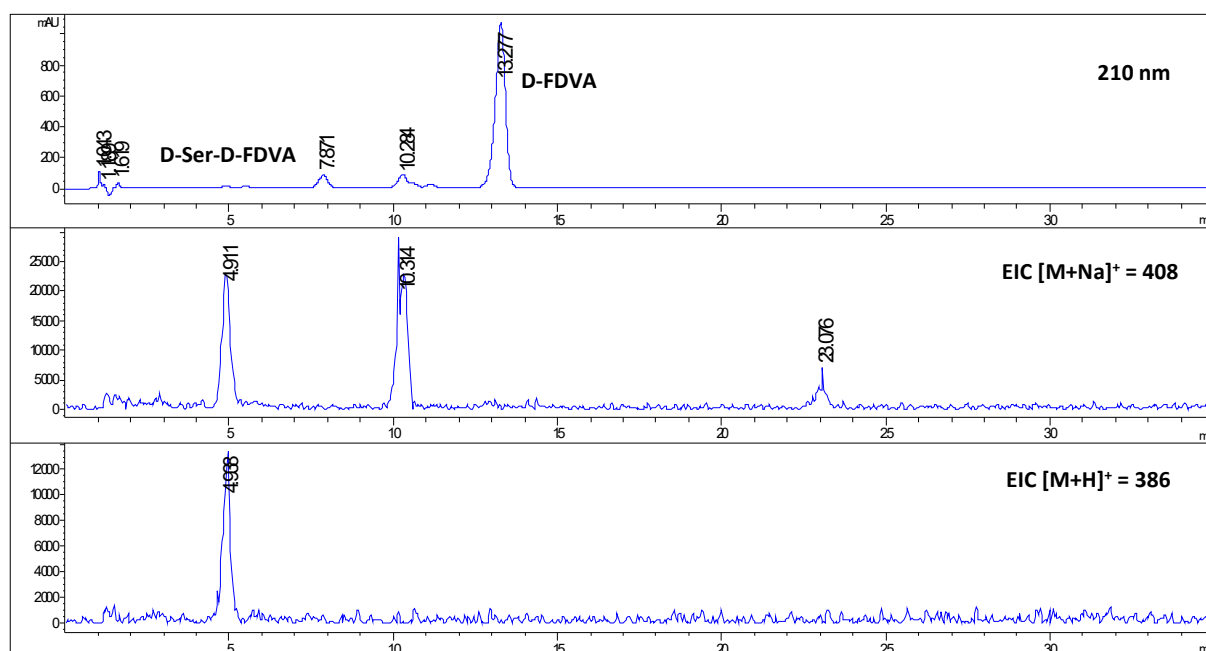

**Figure S16.** Ion extraction of serine-D-FDVA adducts in compound **4**: D-serine (RT = 4.911 min,  $m/z$  408 [M+Na]<sup>+</sup>,  $m/z$  386 [M+H]<sup>+</sup>).

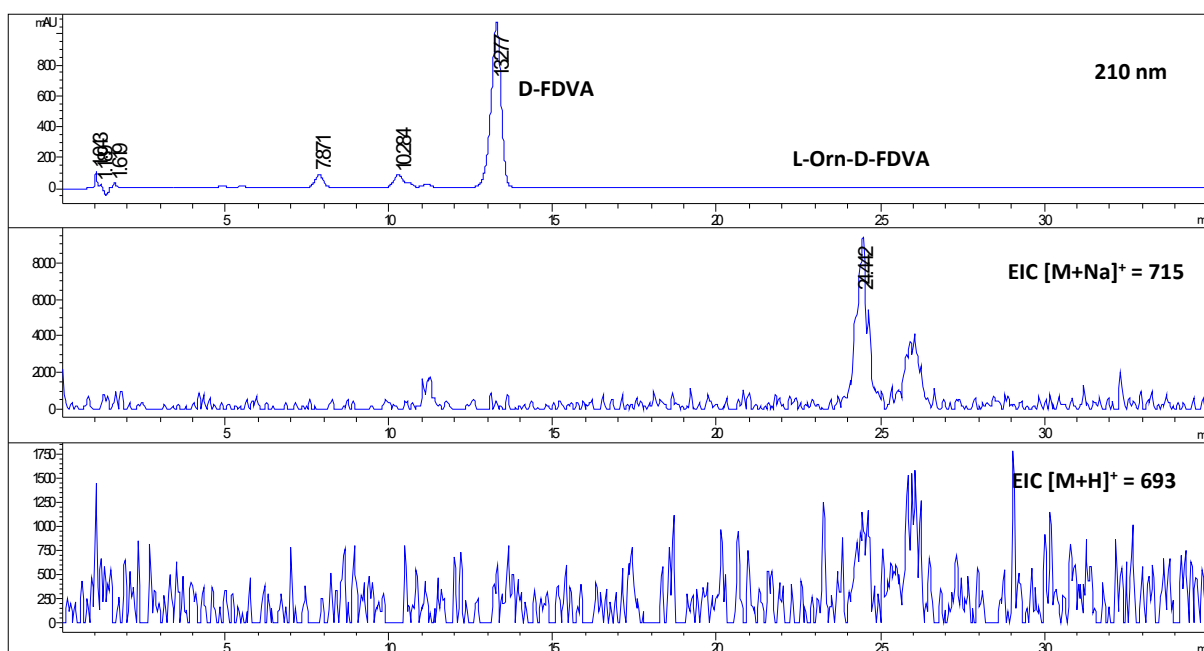

**Figure S17.** Ion extraction of the double ornithine-D-FDVA adducts in compound 4: L-ornithine (RT = 24.442 min,  $m/z$  715  $[M+Na]^+$ ,  $m/z$  693  $[M+H]^+$ ).

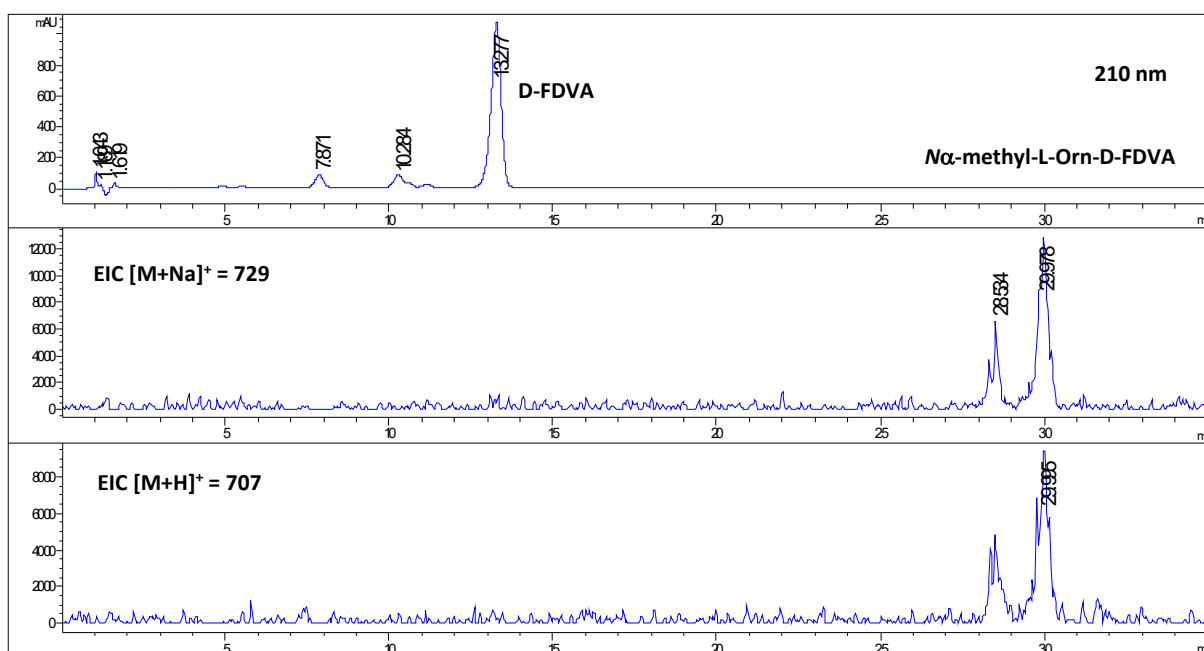

**Figure S18.** Ion extraction of the double  $N\alpha$ -methyl-ornithine-D-FDVA adducts in compound 4:  $N\alpha$ -methyl-L-ornithine (RT = 29.978 min,  $m/z$  729  $[M+Na]^+$ ,  $m/z$  707  $[M+H]^+$ ).

**Table S1.** ORFs present in the madurastatin BGC from *Actinomadura* sp.CA-135719. A comparison with the ORFs present in the *mad* and *rene* BGCs is shown.

| mds<br>gene | Function                                                                   | Length<br>(bp) | Closest BLAST homolog |                                                                  |                      | Homologies with<br><i>mad</i> cluster<br>(% identity/<br>similarity) | Homologies with <i>red</i><br>cluster<br>(% identity/<br>similarity) |
|-------------|----------------------------------------------------------------------------|----------------|-----------------------|------------------------------------------------------------------|----------------------|----------------------------------------------------------------------|----------------------------------------------------------------------|
|             |                                                                            |                | Reference             | Strain                                                           | %Identity/Similarity |                                                                      |                                                                      |
| 1           | Maf family protein                                                         | 600            | WP_163063977.1        | <i>Actinomadura bangladeshensis</i>                              | 84/88                |                                                                      |                                                                      |
| 2           | Inositol monophosphatase                                                   | 834            | WP_163063976.1        | <i>Actinomadura bangladeshensis</i>                              | 86/89                |                                                                      |                                                                      |
| 3           | Predicted NTPase (NACHT family)                                            | 2289           | CNG46166.1            | <i>Mycobacterium tuberculosis</i>                                | 83/88                |                                                                      |                                                                      |
| 4           | TetR/AcrR family transcriptional regulator                                 | 633            | WP_250355147.1        | <i>Actinomadura madurae</i>                                      | 95/96                |                                                                      |                                                                      |
| 5           | STAS domain-containing protein                                             | 396            | WP_021597847.1        | <i>Actinomadura madurae</i>                                      | 87/90                | Mad69 (77/84)                                                        |                                                                      |
| 6           | PaaX family transcriptional regulator C-terminal domain-containing protein | 852            | WP_200871800.1        | <i>Actinomadura madurae</i>                                      | 97/98                |                                                                      | RB99_01649 (82/87)                                                   |
| 7           | ABC transporter substrate-binding protein                                  | 1197           | WP_132199655.1        | <i>Actinomadura darangshiensis</i>                               | 93/97                |                                                                      |                                                                      |
| 8           | ABC transporter ATP-binding protein                                        | 768            | WP_132199656.1        | <i>Actinomadura darangshiensis</i>                               | 95/97                |                                                                      |                                                                      |
| 9           | ABC transporter ATP-binding protein                                        | 777            | WP_111831484.1        | <i>Actinomadura madurae</i>                                      | 88/90                |                                                                      |                                                                      |
| 10          | branched-chain amino acid ABC transporter permease                         | 864            | WP_250370415.1        | <i>Actinomadura madurae</i>                                      | 96/98                |                                                                      |                                                                      |
| 11          | branched-chain amino acid ABC transporter permease                         | 1047           | WP_176405448.1        | <i>Actinomadura</i> sp. BRA 177                                  | 90/93                |                                                                      |                                                                      |
| 12          | long-chain fatty acid--CoA ligase                                          | 1503           | WP_250355151.1        | <i>Actinomadura madurae</i>                                      | 93/96                |                                                                      |                                                                      |
| 13          | IclR family transcriptional regulator                                      | 795            | WP_111831486.1        | <i>Actinomadura madurae</i>                                      | 93/93                |                                                                      | RB99_01648 (83/89)                                                   |
| 14          | IclR family transcriptional regulator C-terminal domain-containing protein | 1020           | WP_250355152.1        | <i>Actinomadura madurae</i>                                      | 94/98                |                                                                      | RB99_01647 (87/91)                                                   |
| 15          | hypothetical protein                                                       | 147            | WP_021597837.1        | <i>Actinomadura madurae</i>                                      | 90/95                |                                                                      | RB99_01646 (81/89)                                                   |
| 16          | ABC transporter permease                                                   | 1638           | WP_250370418.1        | <i>Actinomadura madurae</i>                                      | 92/95                | Mad68 (77/85)                                                        | RB99_01645 (78/86)                                                   |
| 17          | ABC transporter ATP-binding protein                                        | 903            | WP_021599067.1        | <i>Actinomadura madurae</i>                                      | 95/97                | Mad67 (90/94)                                                        | RB99_01644 (89/93)                                                   |
| 18          | TetR/AcrR family transcriptional regulator                                 | 675            | WP_021599066.1        | <i>Actinomadura madurae</i>                                      | 89/93                | Mad66 (78/85)                                                        | RB99_01643 (75/82)                                                   |
| 19          | iron chelate uptake ABC transporter family permease subunit                | 1050           | NVI90222.1            | <i>Actinomadura</i> sp. BRA 177                                  | 85/89                | Mad65 (86/89)                                                        | RB99_01642 (80/86)                                                   |
| 20          | Iron chelate uptake ABC transporter family permease subunit                | 1020           | WP_132160734.1        | <i>Actinomadura</i> sp. 7K507                                    | 88/93                | Mad64 (90/94)                                                        | RB99_01641 (86/90)                                                   |
| 21          | non-ribosomal peptide synthetase                                           | 3366           | WP_111831488.1        | <i>Actinomadura madurae</i>                                      | 92/93                | Mad63 (87/91)                                                        | ReneQ (83/87)                                                        |
| 22          | Enterobactin transporter EntS                                              | 1248           | WP_111831489.1        | <i>Actinomadura madurae</i>                                      | 95/97                | Mad62 (88/93)                                                        | ReneP (79/83)                                                        |
| 23          | aspartate 1-decarboxylase                                                  | 387            | WP_250370422.1        | <i>Actinomadura madurae</i>                                      | 98/99                | Mad61 (94/98)                                                        | ReneO (85/91)                                                        |
| 24          | AMP-binding protein                                                        | 1581           | WP_021593700.1        | <i>Actinomadura madurae</i>                                      | 95/97                | Mad60 (87/92)                                                        | ReneN (82/90)                                                        |
| 25          | NBR1-Ig-like domain-containing protein                                     | 906            | WP_250355158.1        | <i>Actinomadura madurae</i>                                      | 79/83                |                                                                      |                                                                      |
| 26          | Enoyl-CoA hydratase/isomerase family protein                               | 414            | WP_075021693.1        | <i>Actinomadura madurae</i>                                      | 78/86                |                                                                      |                                                                      |
| 27          | glyoxalase                                                                 | 612            | WP_075021694.1        | <i>Actinomadura madurae</i>                                      | 88/93                |                                                                      |                                                                      |
| 28          | Unknown protein                                                            | 411            |                       |                                                                  |                      |                                                                      |                                                                      |
| 29          | DUF418 domain-containing protein                                           | 975            | NVI87458.1            | <i>Actinomadura madurae</i>                                      | 83/87                |                                                                      |                                                                      |
| 30          | Unknown protein                                                            | 564            |                       |                                                                  |                      |                                                                      |                                                                      |
| 31          | threonine/serine dehydratase                                               | 930            | WP_088950310.1        | <i>Micromonospora zamorensis</i>                                 | 64/74                |                                                                      |                                                                      |
| 32          | Hypothetical proline hydroxylase                                           | 816            | WP_204927031.1        | <i>Micromonospora humida</i>                                     | 49/63                |                                                                      |                                                                      |
| 33          | Acetyl transferase                                                         | 468            | KKP60044.1            | <i>Candidatus Roizmanbacteria bacterium</i><br>GW2011_GWA2_34_18 | 55/71                |                                                                      |                                                                      |
| 34          | 5'-methylthioadenosine/adenosylhomocysteine nucleosidase                   | 771            | WP_122919150.1        | <i>Brevibacillus fluminis</i>                                    | 38/53                |                                                                      |                                                                      |
| 35          | Caspase family protein                                                     | 4251           | WP_040693739.1        | <i>Nocardia vinacea</i>                                          | 42/54                |                                                                      |                                                                      |
| 36          | Salicylate synthase                                                        | 1311           | WP_021593683.1        | <i>Actinomadura madurae</i>                                      | 87/92                | Mad31 (82/88)                                                        | ReneM (76/83)                                                        |

|    |                                                            |       |                |                                    |       |               |               |
|----|------------------------------------------------------------|-------|----------------|------------------------------------|-------|---------------|---------------|
| 37 | NRPS                                                       | 11898 | WP_024934912.1 | <i>Actinomadura madurae</i>        | 92/94 | Mad30 (86/89) | ReneL (80/85) |
| 38 | iron-siderophore ABC transporter substrate-binding protein | 1026  | WP_033331134.1 | <i>Actinomadura madurae</i>        | 91/94 | Mad29 (80/87) | ReneK (77/87) |
| 39 | lysine N(6)-hydroxylase/L-ornithine N(5)-oxygenase         | 1272  | WP_250355177.1 | <i>Actinomadura madurae</i>        | 95/97 | Mad28 (89/92) | ReneJ (86/89) |
| 40 | MbtH family protein                                        | 198   | WP_255273069.1 | <i>Actinomadura madurae</i>        | 97/98 | Mad27 (88/90) | ReneI (78/84) |
| 41 | PHB depolymerase family esterase                           | 864   | WP_021593677.1 | <i>Actinomadura madurae</i>        | 89/93 | Mad26 (81/90) | ReneH (80/90) |
| 42 | MFS transporter                                            | 1272  | WP_151597199.1 | <i>Actinomadura madurae</i>        | 90/95 | Mad25 (90/91) | ReneG (90/95) |
| 43 | MarR family transcriptional regulator                      | 474   | WP_208269029.1 | <i>Actinomadura nitriligenes</i>   | 82/88 |               | ReneF (82/88) |
| 44 | Unknown protein                                            | 135   |                |                                    |       |               |               |
| 45 | phosphotransferase family protein                          | 1032  | WP_244938629.1 | <i>Actinomadura madurae</i>        | 90/94 |               | ReneC (79/85) |
| 46 | Unknown protein                                            | 129   |                |                                    |       |               |               |
| 47 | MaoC family dehydratase                                    | 453   | WP_021593675.1 | <i>Actinomadura madurae</i>        | 98/98 |               | ReneB (85/92) |
| 48 | long-chain fatty acid--CoA ligase                          | 1647  | WP_250355181.1 | <i>Actinomadura madurae</i>        | 95/97 | Mad24 (91/96) | ReneA (90/94) |
| 49 | TetR/Acr family transcriptional regulator                  | 609   | WP_075021705.1 | <i>Actinomadura madurae</i>        | 93/96 | Mad23 (89/94) |               |
| 50 | ABC transporter ATP-binding protein                        | 780   | WP_250355182.1 | <i>Actinomadura madurae</i>        | 94/96 | Mad22 (90/93) |               |
| 51 | ABC transporter ATP-binding protein                        | 708   | WP_089328063.1 | <i>Actinomadura madurae</i>        | 95/97 | Mad21 (90/94) |               |
| 52 | Branched-chain amino acid ABC transporter permease         | 879   | WP_132203346.1 | <i>Actinomadura darangshiensis</i> | 97/98 | Mad20 (95/96) |               |
| 53 | Branched-chain amino acid ABC transporter permease         | 1206  | WP_218163691.1 | <i>Actinomadura darangshiensis</i> | 97/97 | Mad19 (88/91) |               |
| 54 | ABC transporter substrate-binding protein                  | 1278  | WP_024934907.1 | <i>Actinomadura madurae</i>        | 94/97 | Mad18 (93/97) |               |
| 55 | Transcriptional regulator, DeoR family                     | 804   | SFO45426.1     | <i>Actinomadura madurae</i>        | 97/98 | Mad17 (95/98) |               |
| 56 | HPr family phosphocarrier protein                          | 279   | WP_021599327.1 | <i>Actinomadura madurae</i>        | 98/98 |               |               |
| 57 | zinc-dependent dehydrogenase                               | 1041  | WP_021599328.1 | <i>Actinomadura madurae</i>        | 98/99 |               |               |
| 58 | PTS system IIA component, Fru family                       | 498   | SFO45486.1     | <i>Actinomadura madurae</i>        | 92/95 |               |               |
| 59 | PTS lactose transporter subunit IIB                        | 300   | WP_250355189.1 | <i>Actinomadura madurae</i>        | 95/95 |               |               |
| 60 | PTS mannitol transporter subunit IICB                      | 1242  | WP_250355190.1 | <i>Actinomadura madurae</i>        | 92/93 |               |               |
| 61 | fructose-1-phosphate kinase                                | 939   | SFO45542.1     | <i>Actinomadura madurae</i>        | 98/98 | Mad16 (98/97) |               |

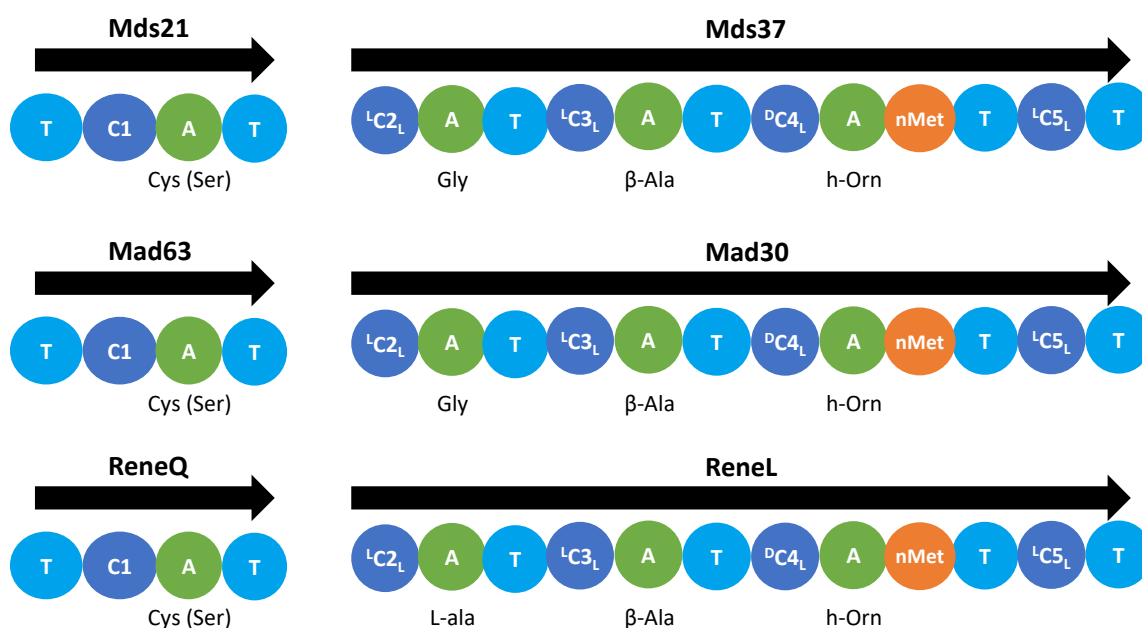

**Figure S19.** Comparison of the NRPS genes from *mad*, *rene*, and *mds* clusters. The predicted amino acids incorporated by each NRPS module are indicated.

The mechanism of 4-imidazolidinone formation in madurastatins is similar to that occurring when the *N*-terminal amine group of peptides reacts with formaldehyde to form a hydroxymethyl intermediate. This hydroxymethyl derivative undergoes dehydration to give an imine (Schiff-base), which is also the key intermediate for the demethylation reaction, and the production of the 4-imidazolidinone moiety (Figure S6).

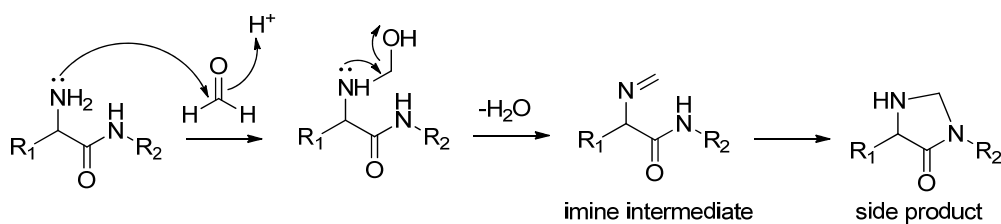

**Figure S20.** Scheme of side reaction involved in dimethyl-labeling of peptides with formaldehyde.



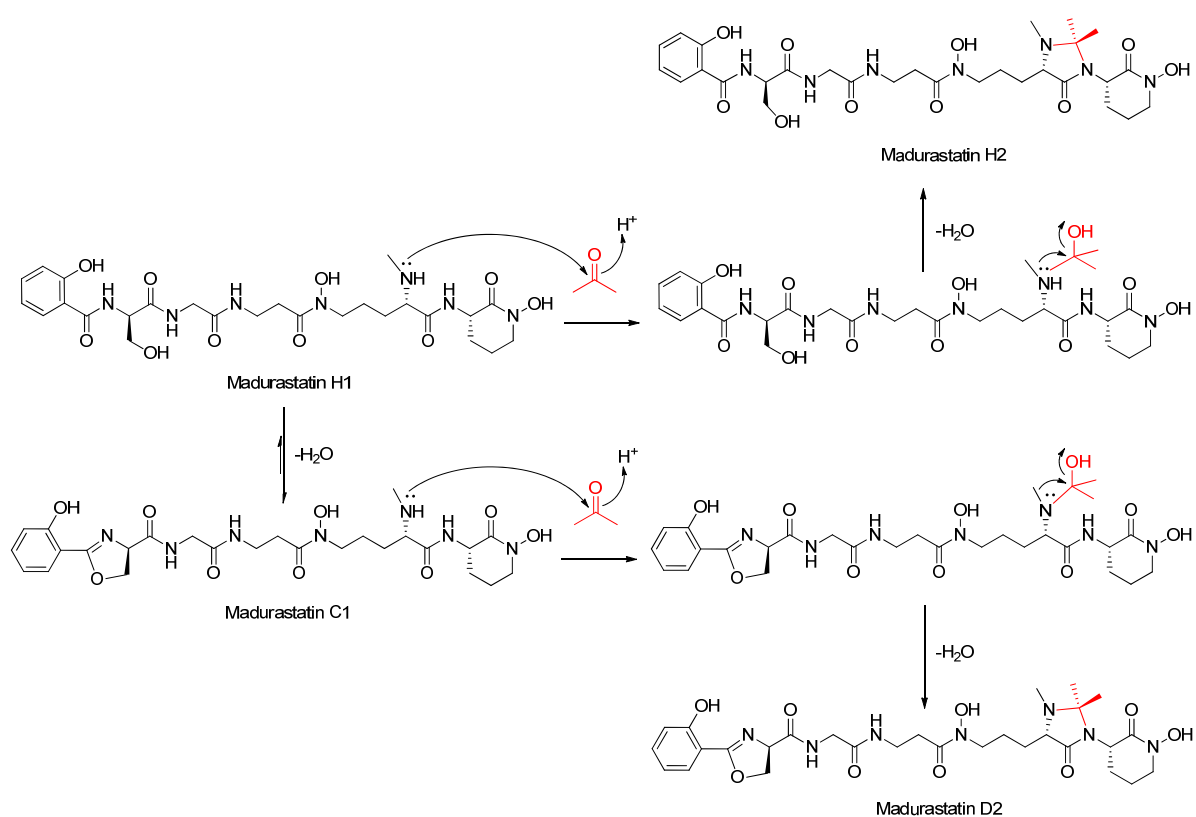

**Figure S21.** Scheme of the formation reaction to produce madurastatins H2 (2) and D2 (5).

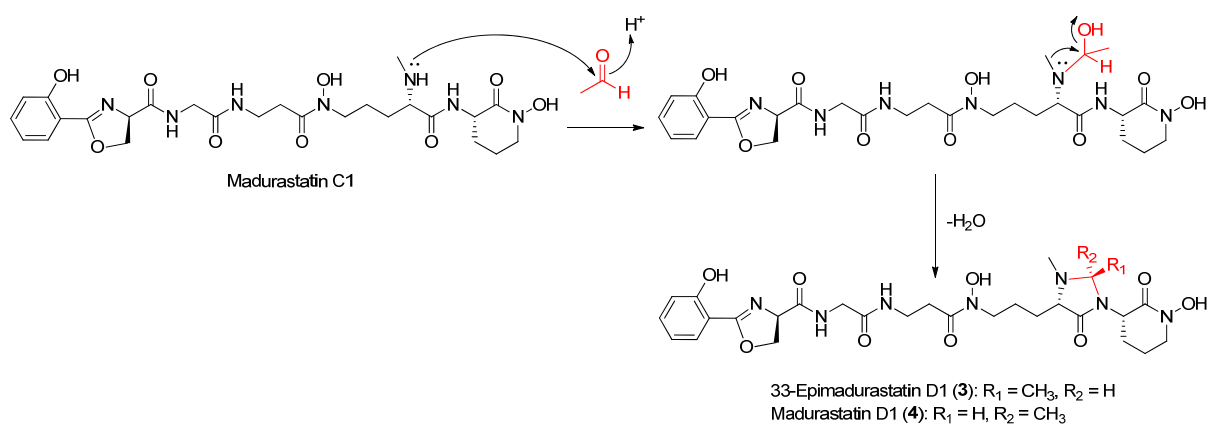

**Figure S22.** Scheme of the formation reaction to produce 33-epimadurastatin D1 (3) and madurastatin D1 (4).

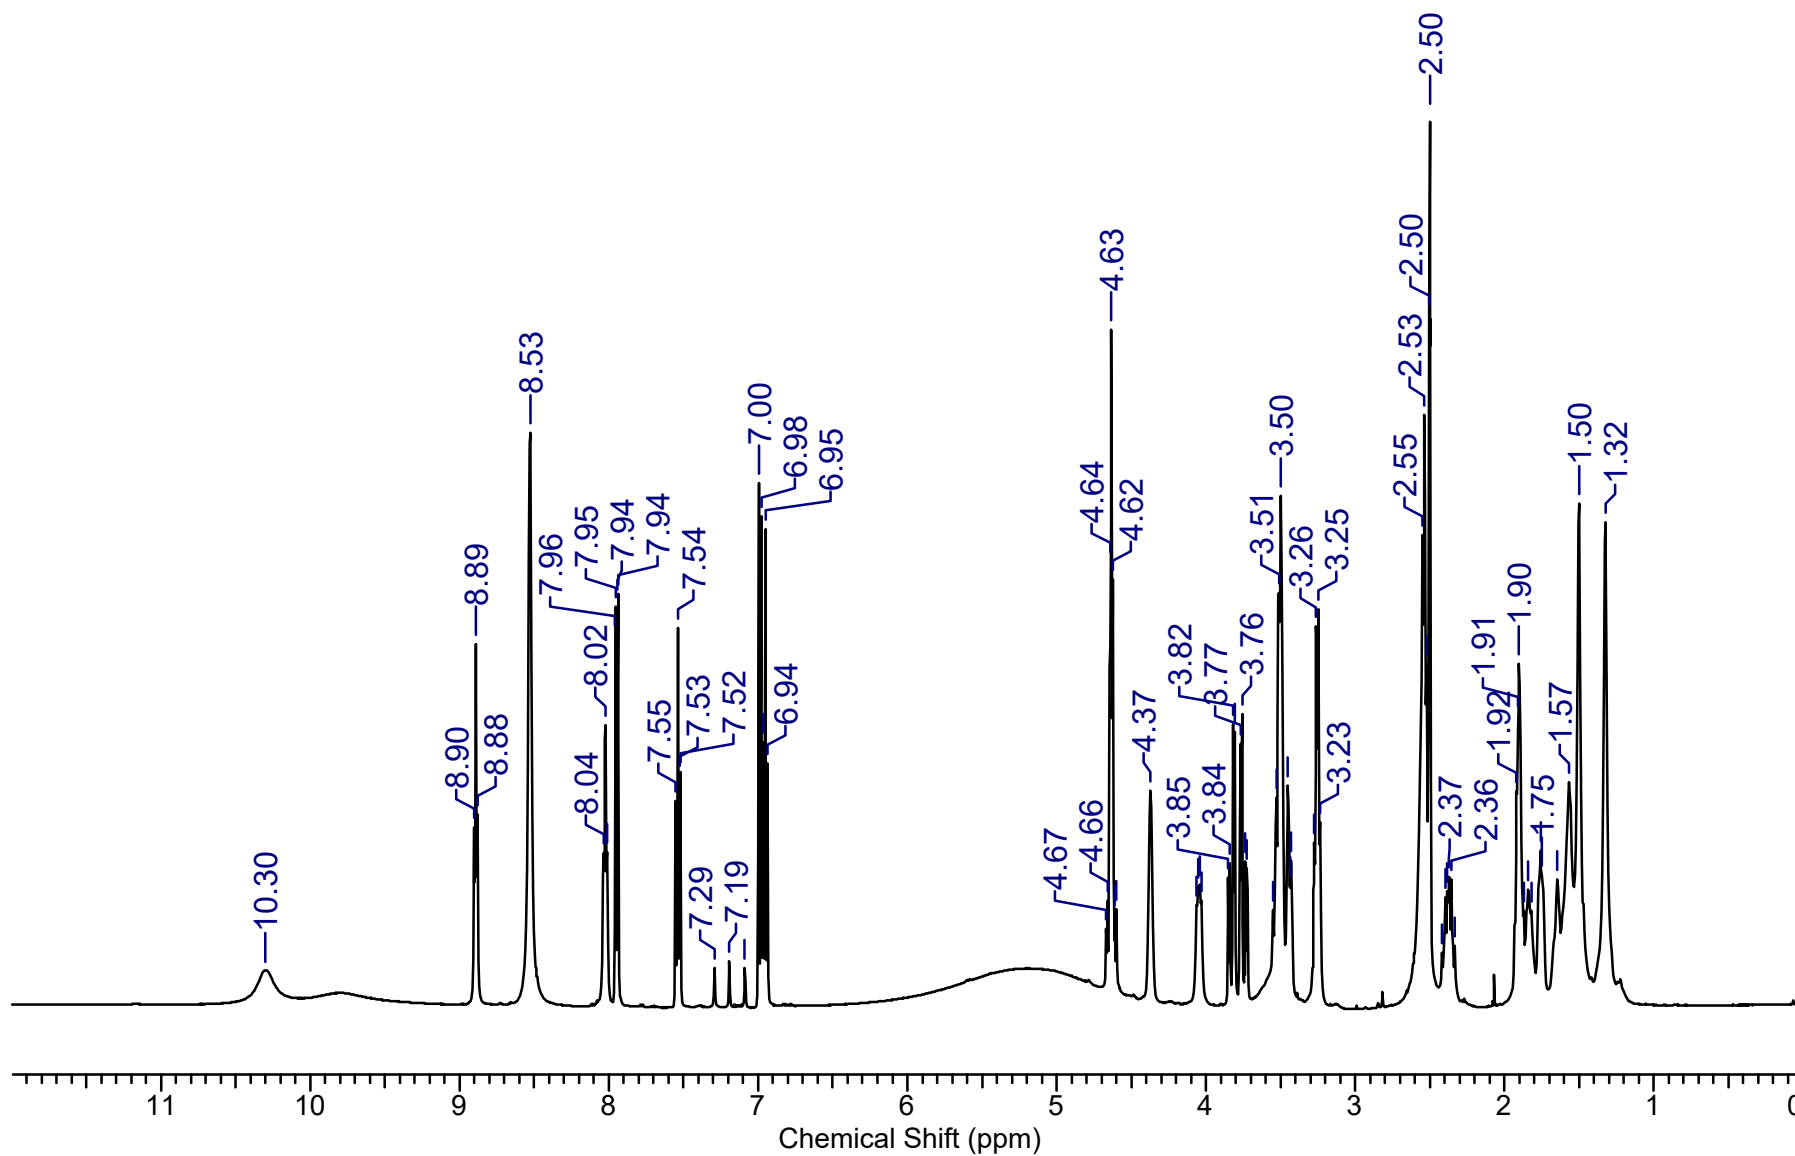

**Figure S23.**  $^1\text{H}$ -NMR (500 MHz, dimethyl sulfoxide- $d_6$ ) spectrum of madurastatin H2 (2).

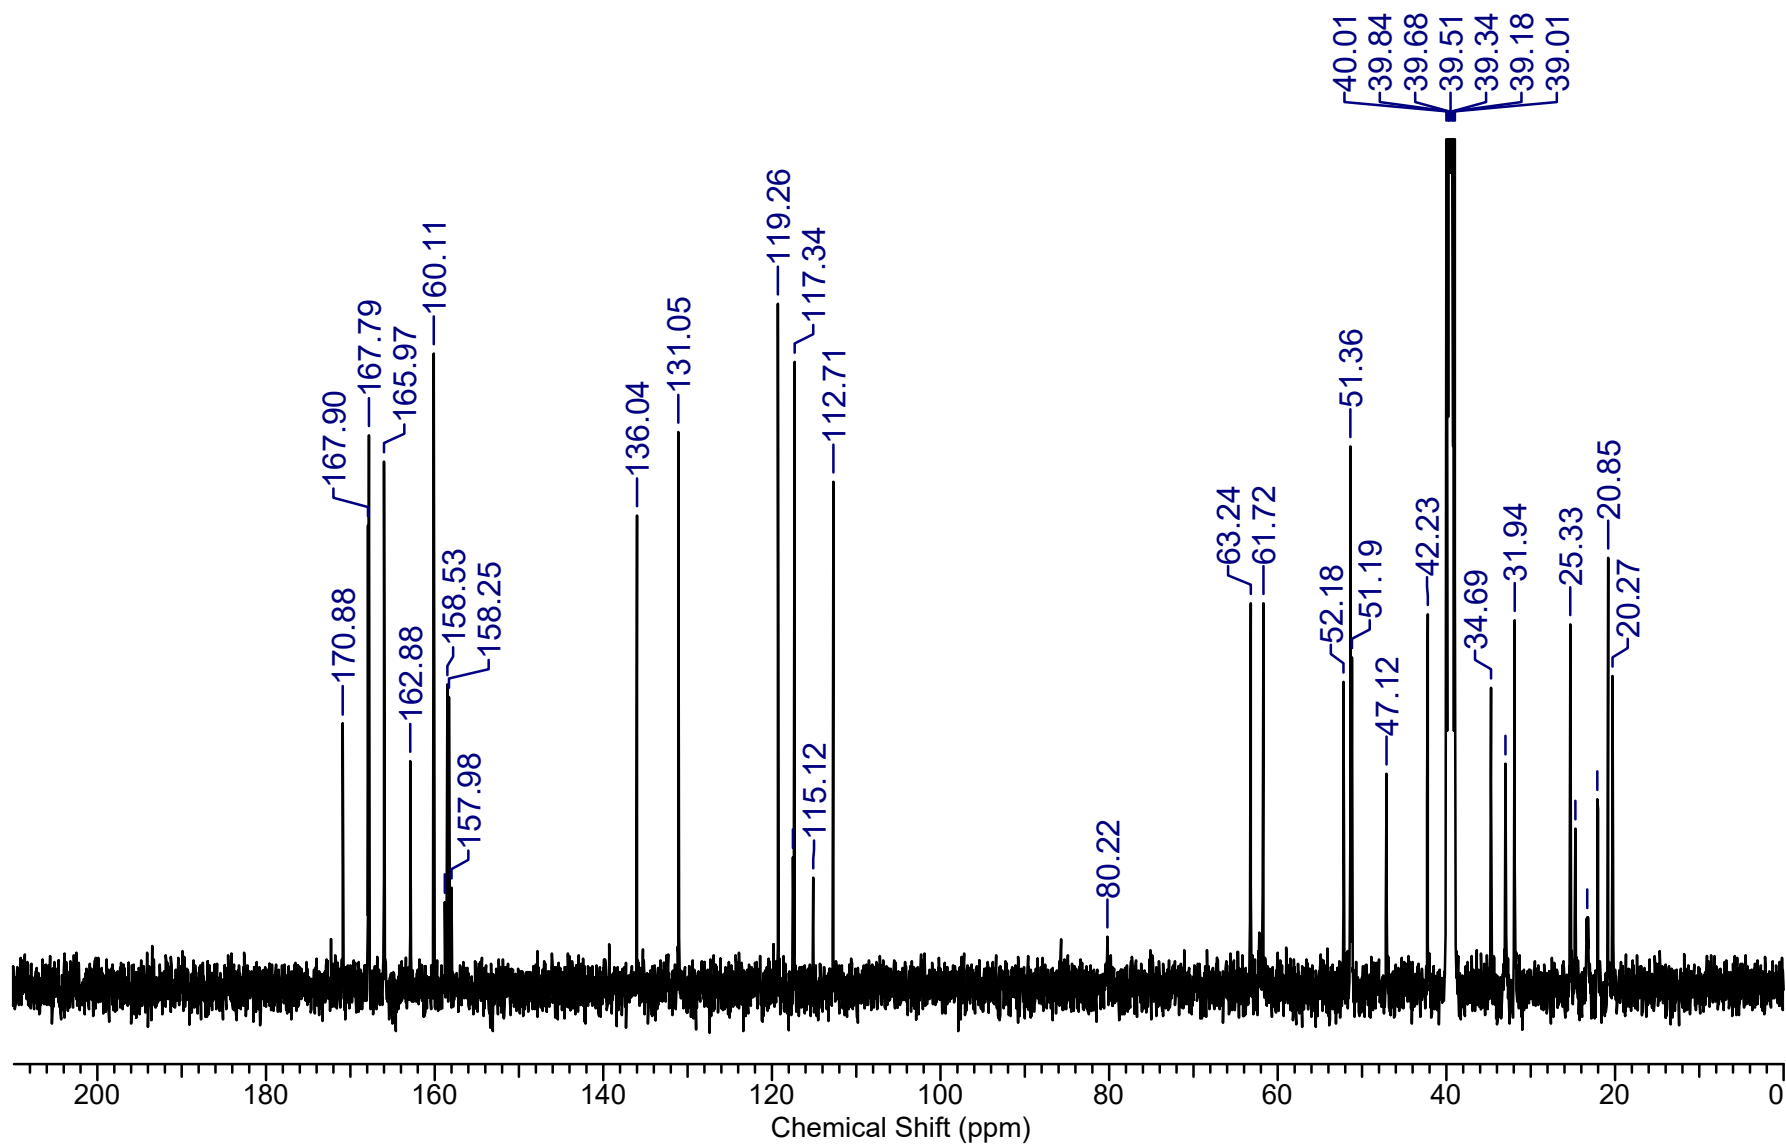

**Figure S24.**  $^{13}\text{C}$ -NMR (125 MHz, dimethyl sulfoxide- $d_6$ ) spectrum of madurastatin H2 (**2**).

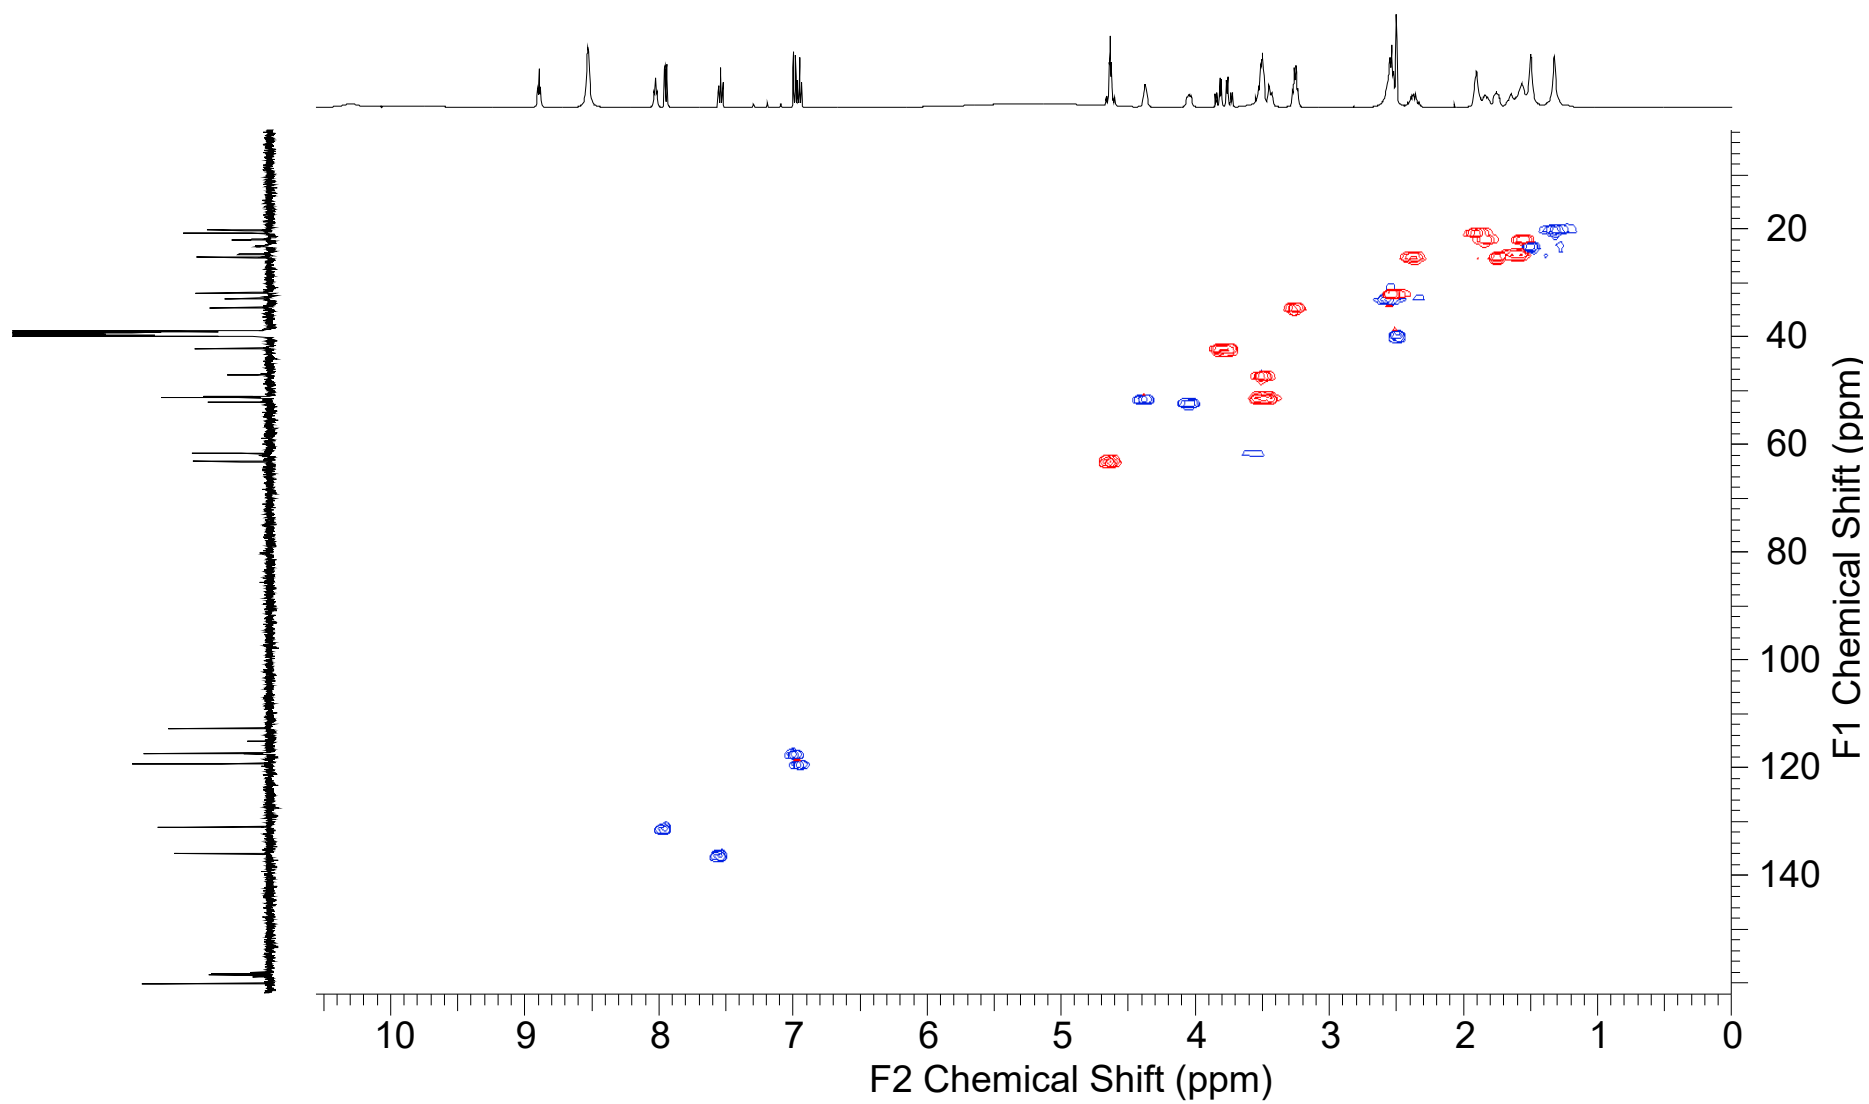

Figure S25. HSQC (dimethyl sulfoxide- $d_6$ ) spectrum of madurastatin H2 (2).

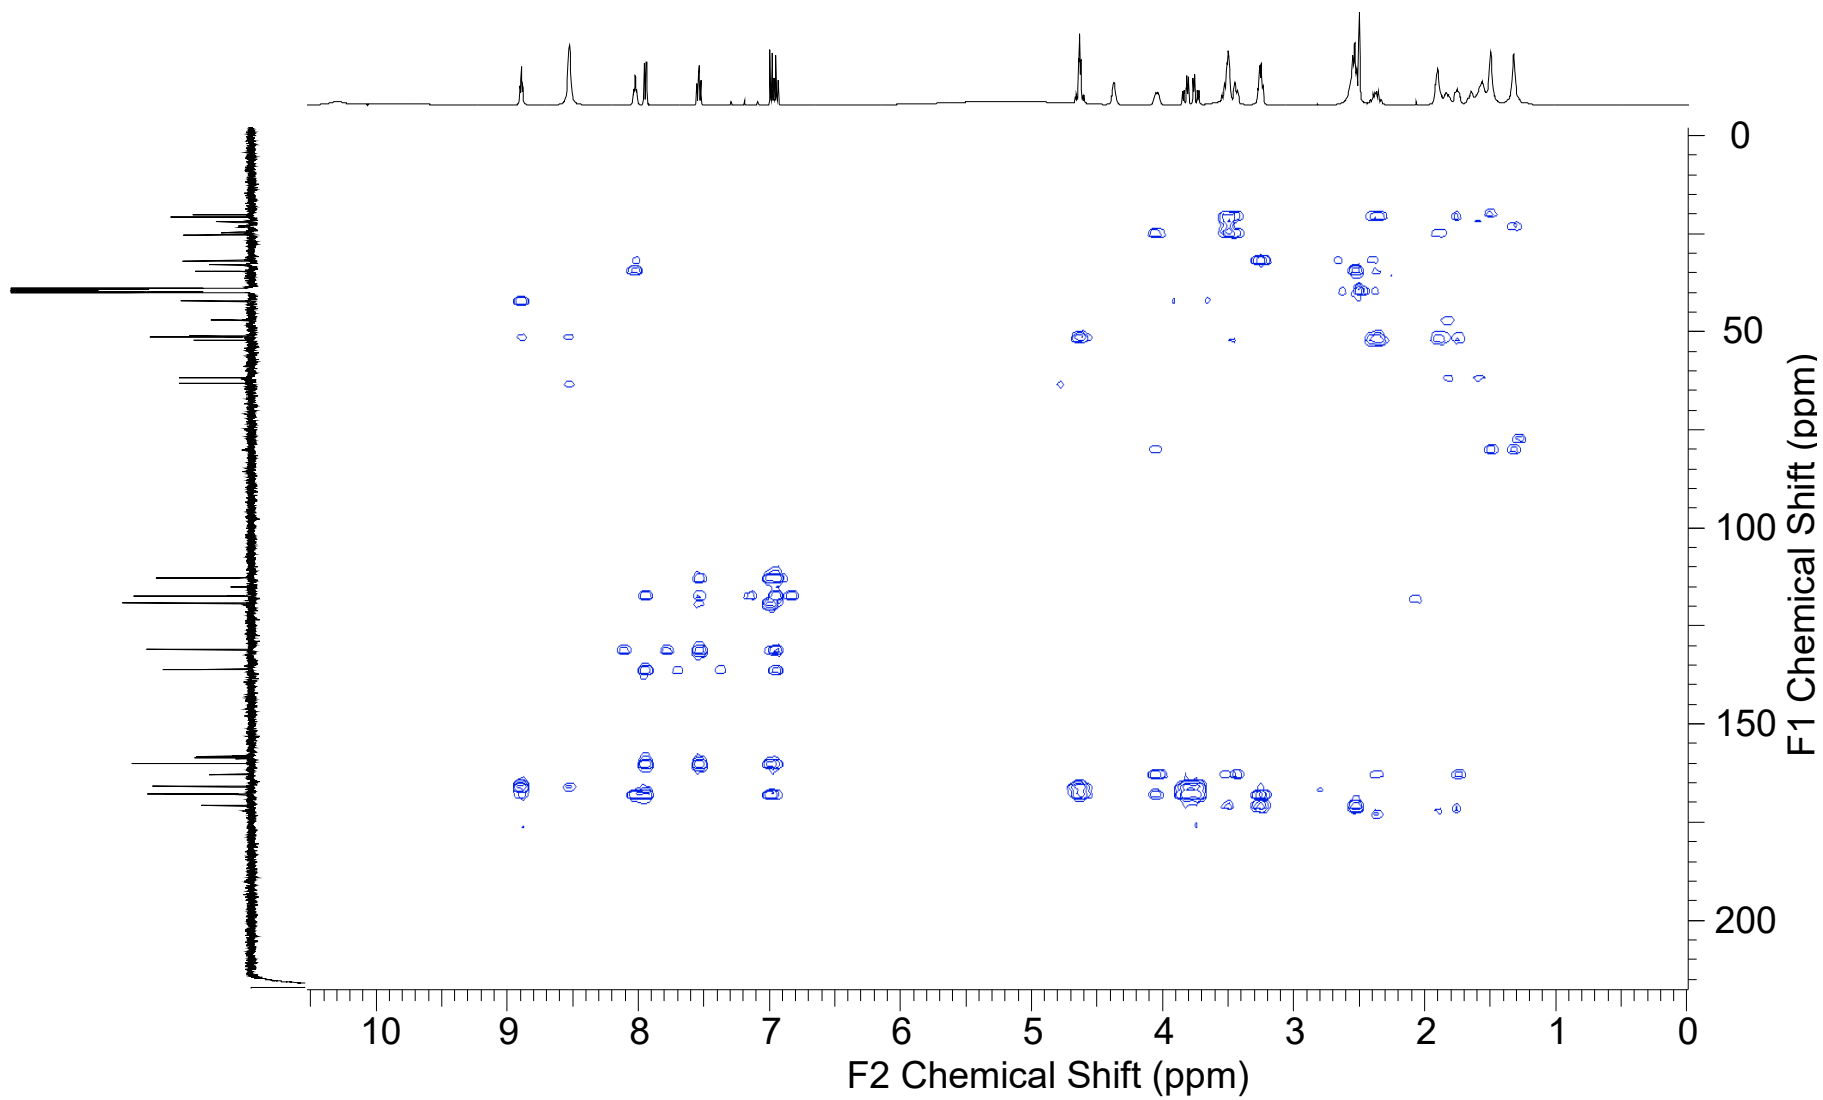

**Figure S26.** HMBC (dimethyl sulfoxide-*d*<sub>6</sub>) spectrum of madurastatin H2 (2).

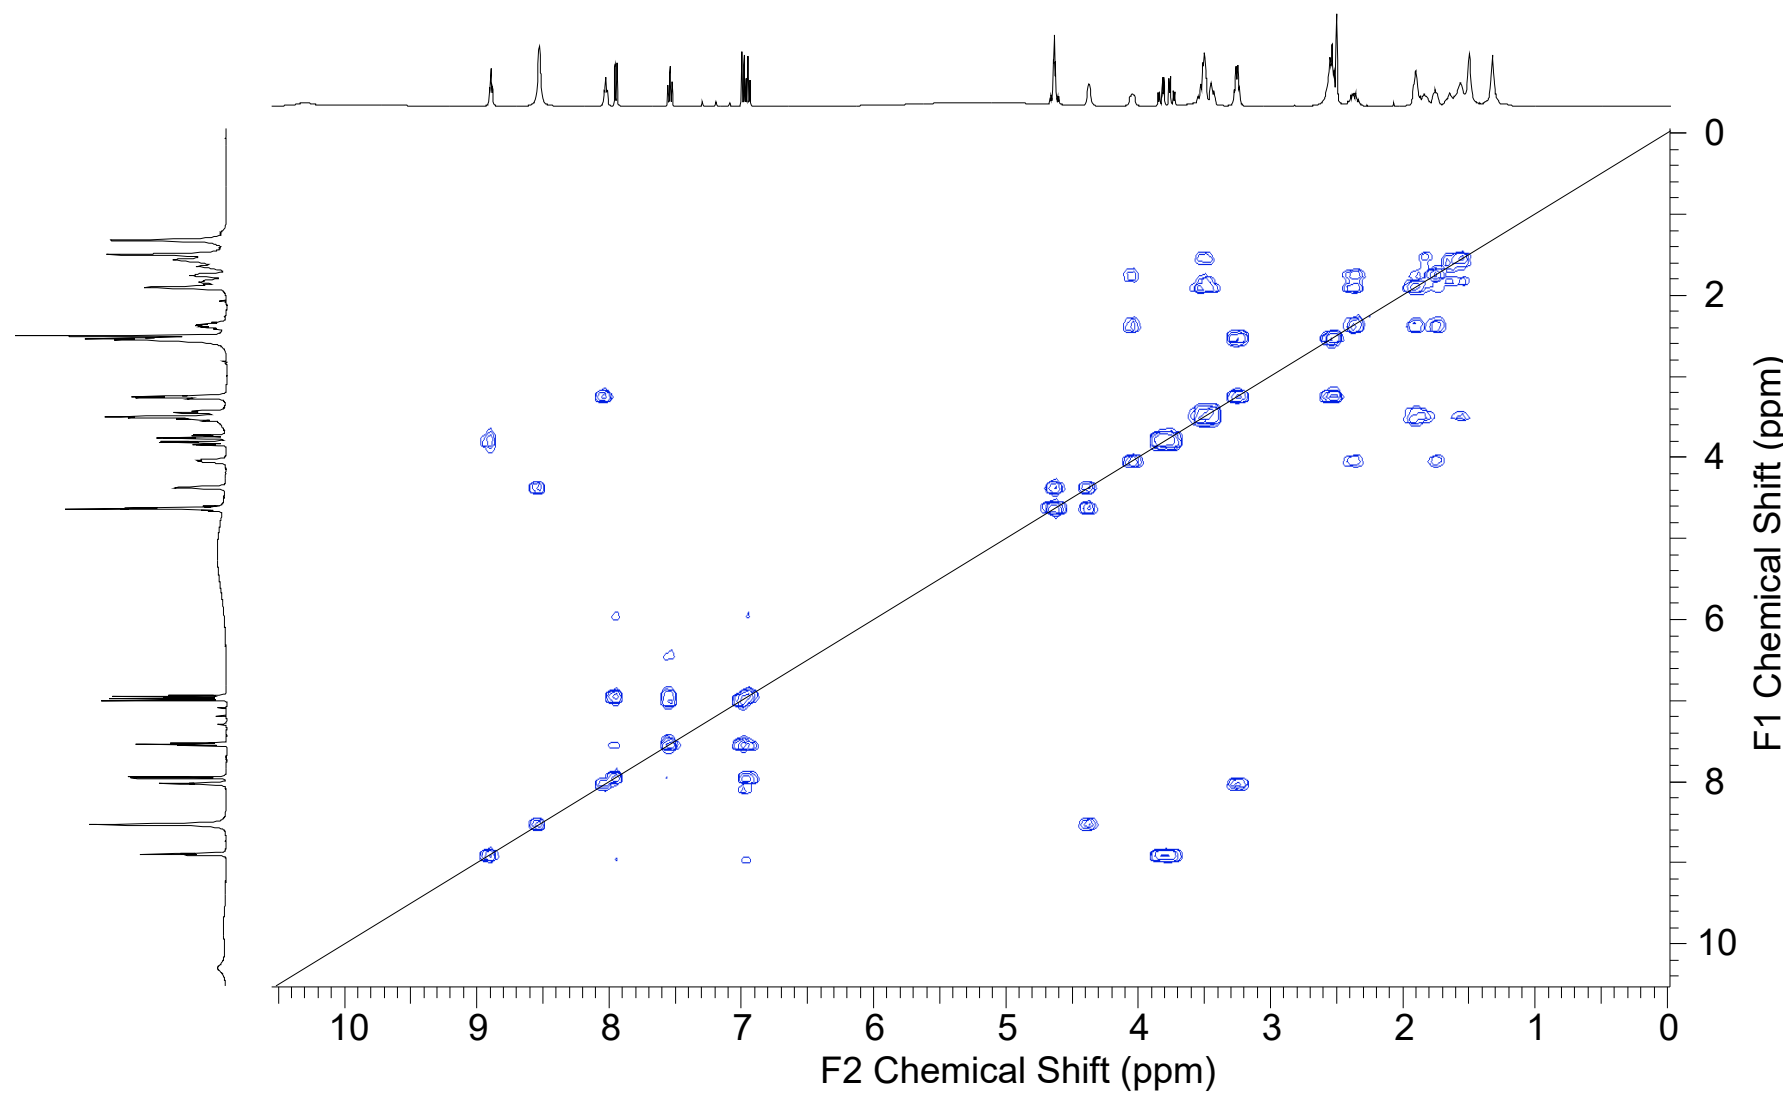

**Figure S27.** COSY (dimethyl sulfoxide-*d*<sub>6</sub>) spectrum of madurastatin H2 (2).

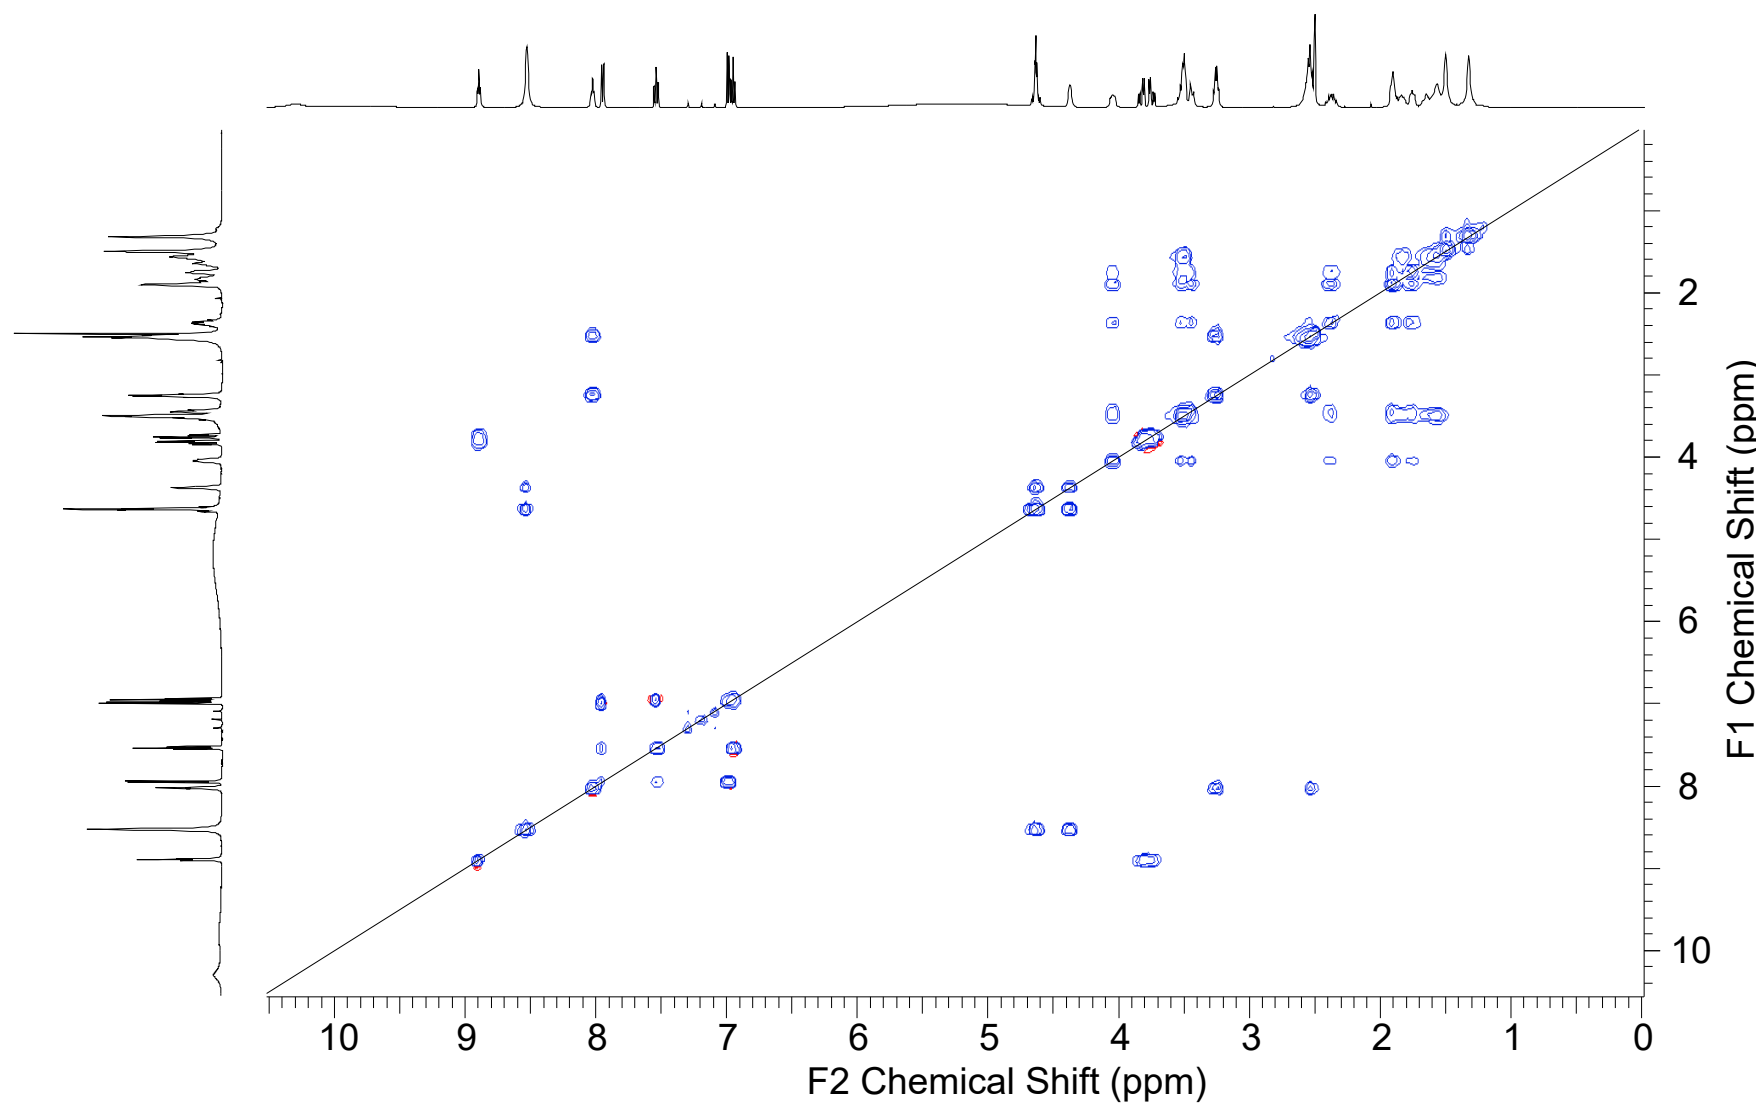

**Figure S28.** TOCSY (dimethyl sulfoxide- $d_6$ ) spectrum of madurastatin H2 (2).

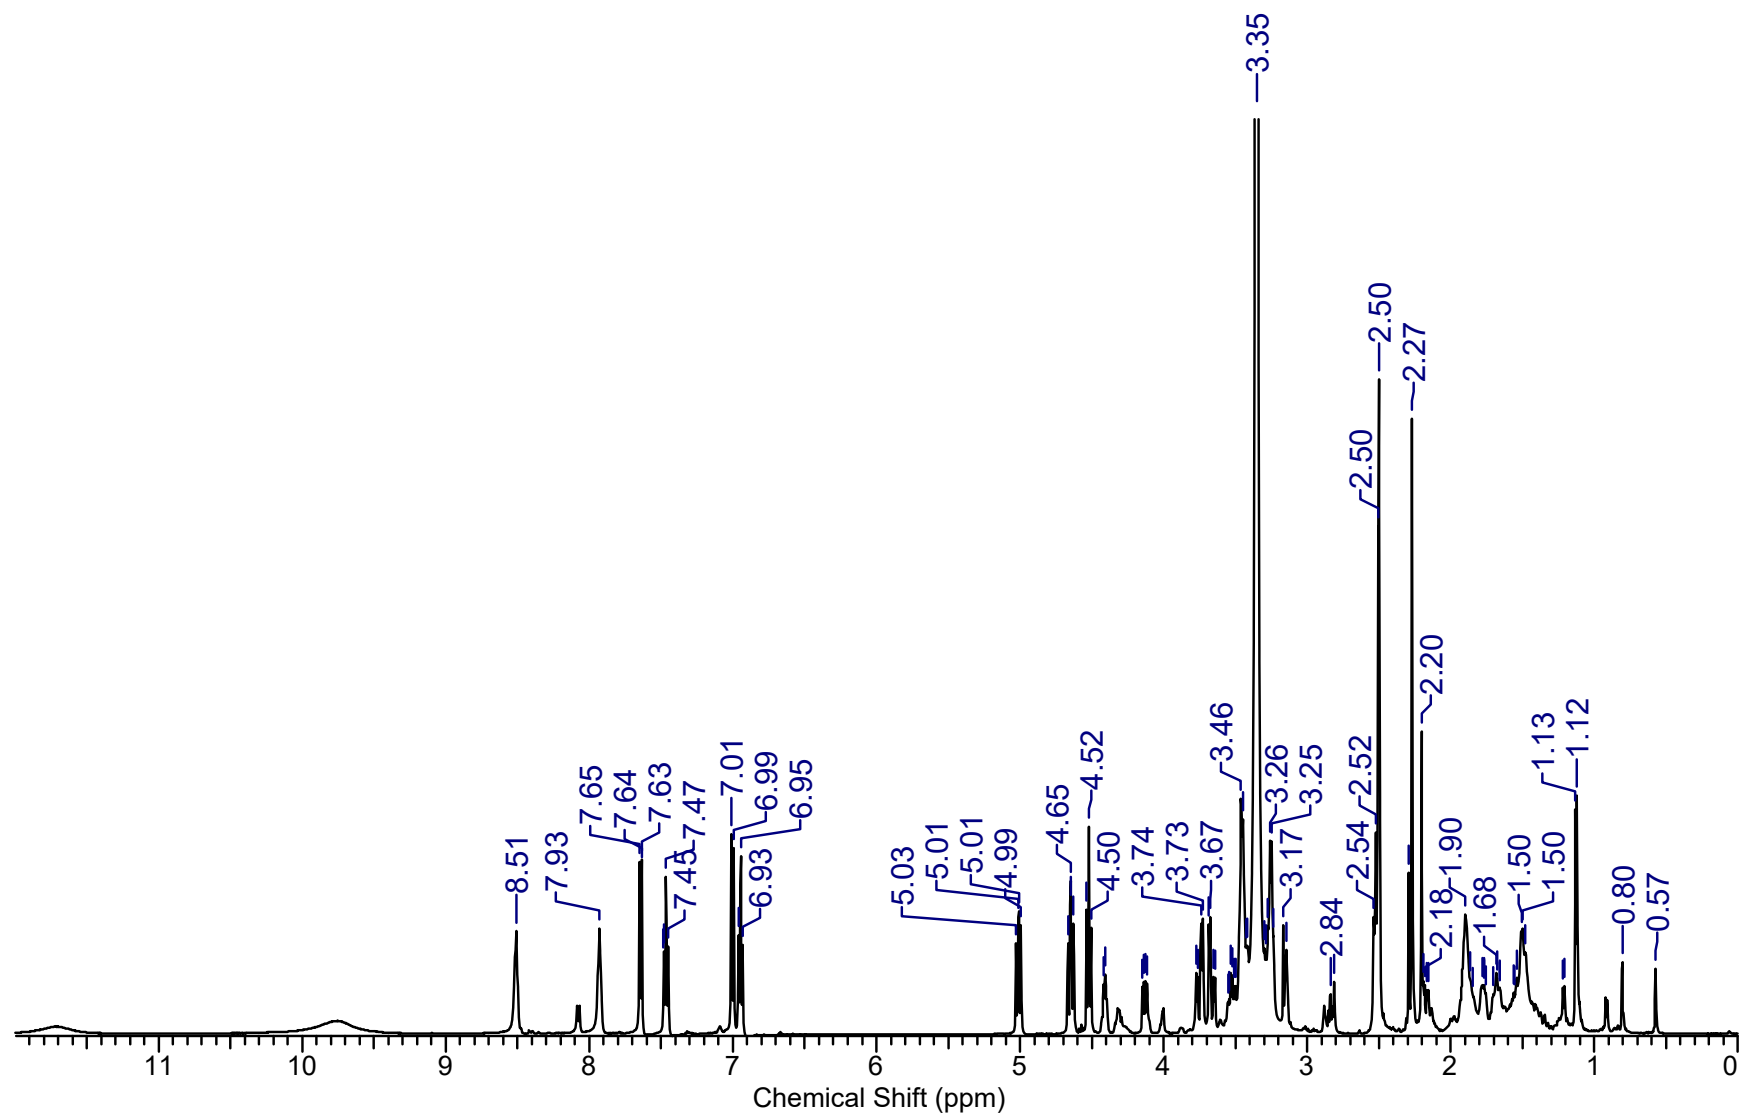

**Figure S29.**  $^1\text{H}$ -NMR (500 MHz, dimethyl sulfoxide- $d_6$ ) spectrum of 33-*epi*-madurastatin D1 (**3**).



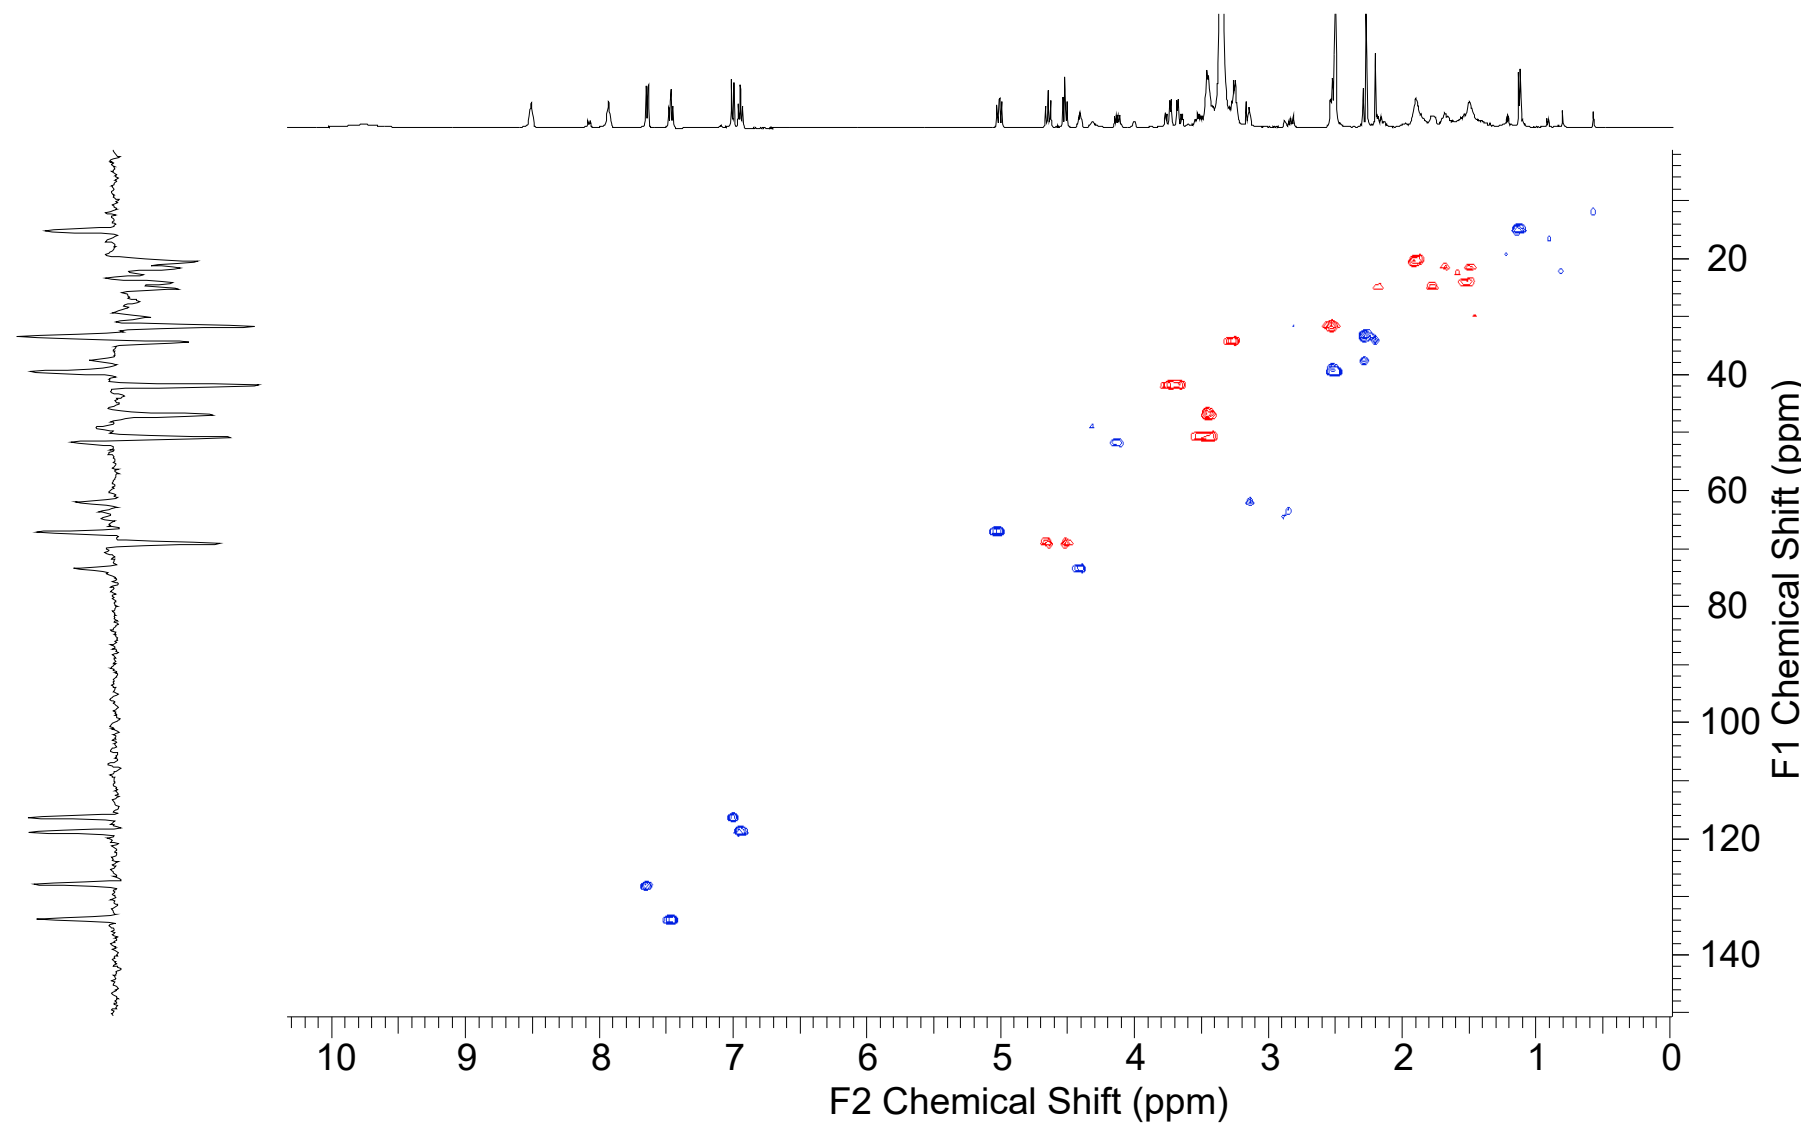

**Figure S30.** HSQC (dimethyl sulfoxide- $d_6$ ) spectrum of 33-*epi*-madurastatin D1 (3).

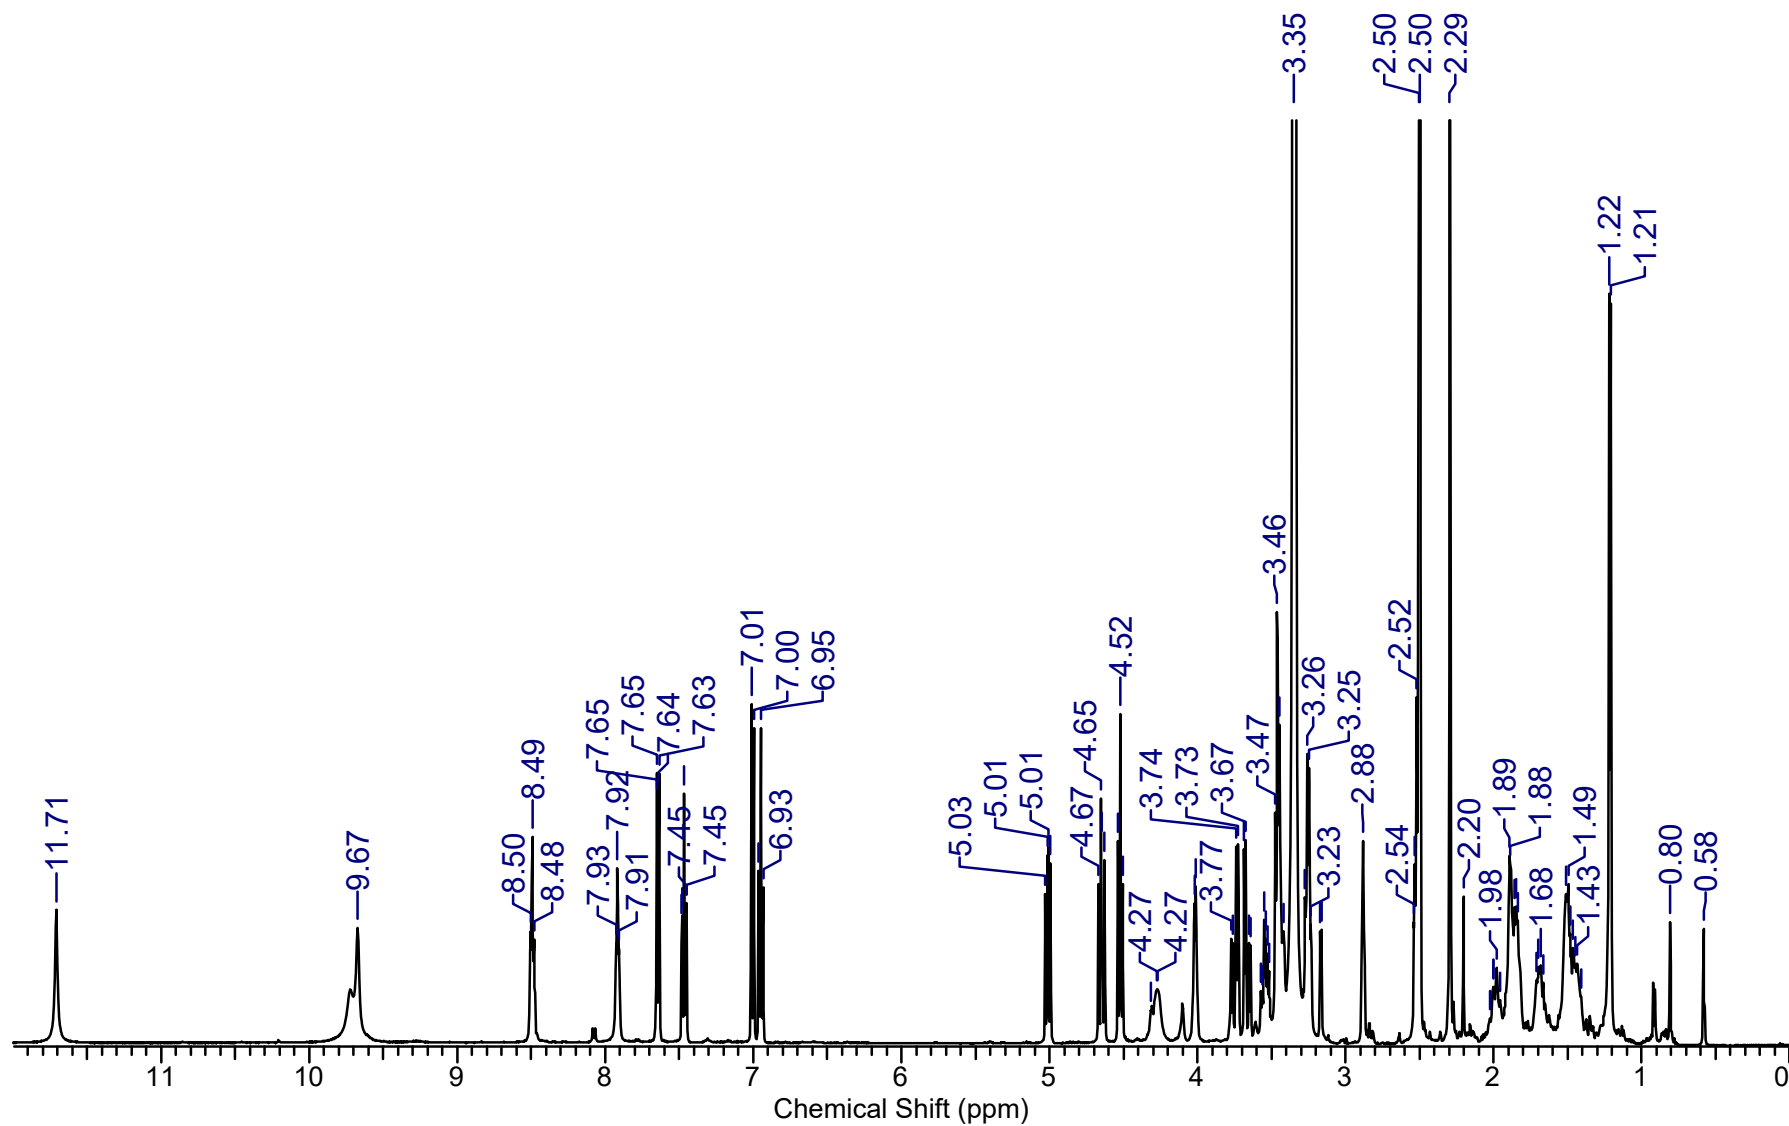

**Figure S31.**  $^1\text{H}$ -NMR (500 MHz,  $\text{dimethyl sulfoxide-}d_6$ ) spectrum of madurastatin D1 (4).

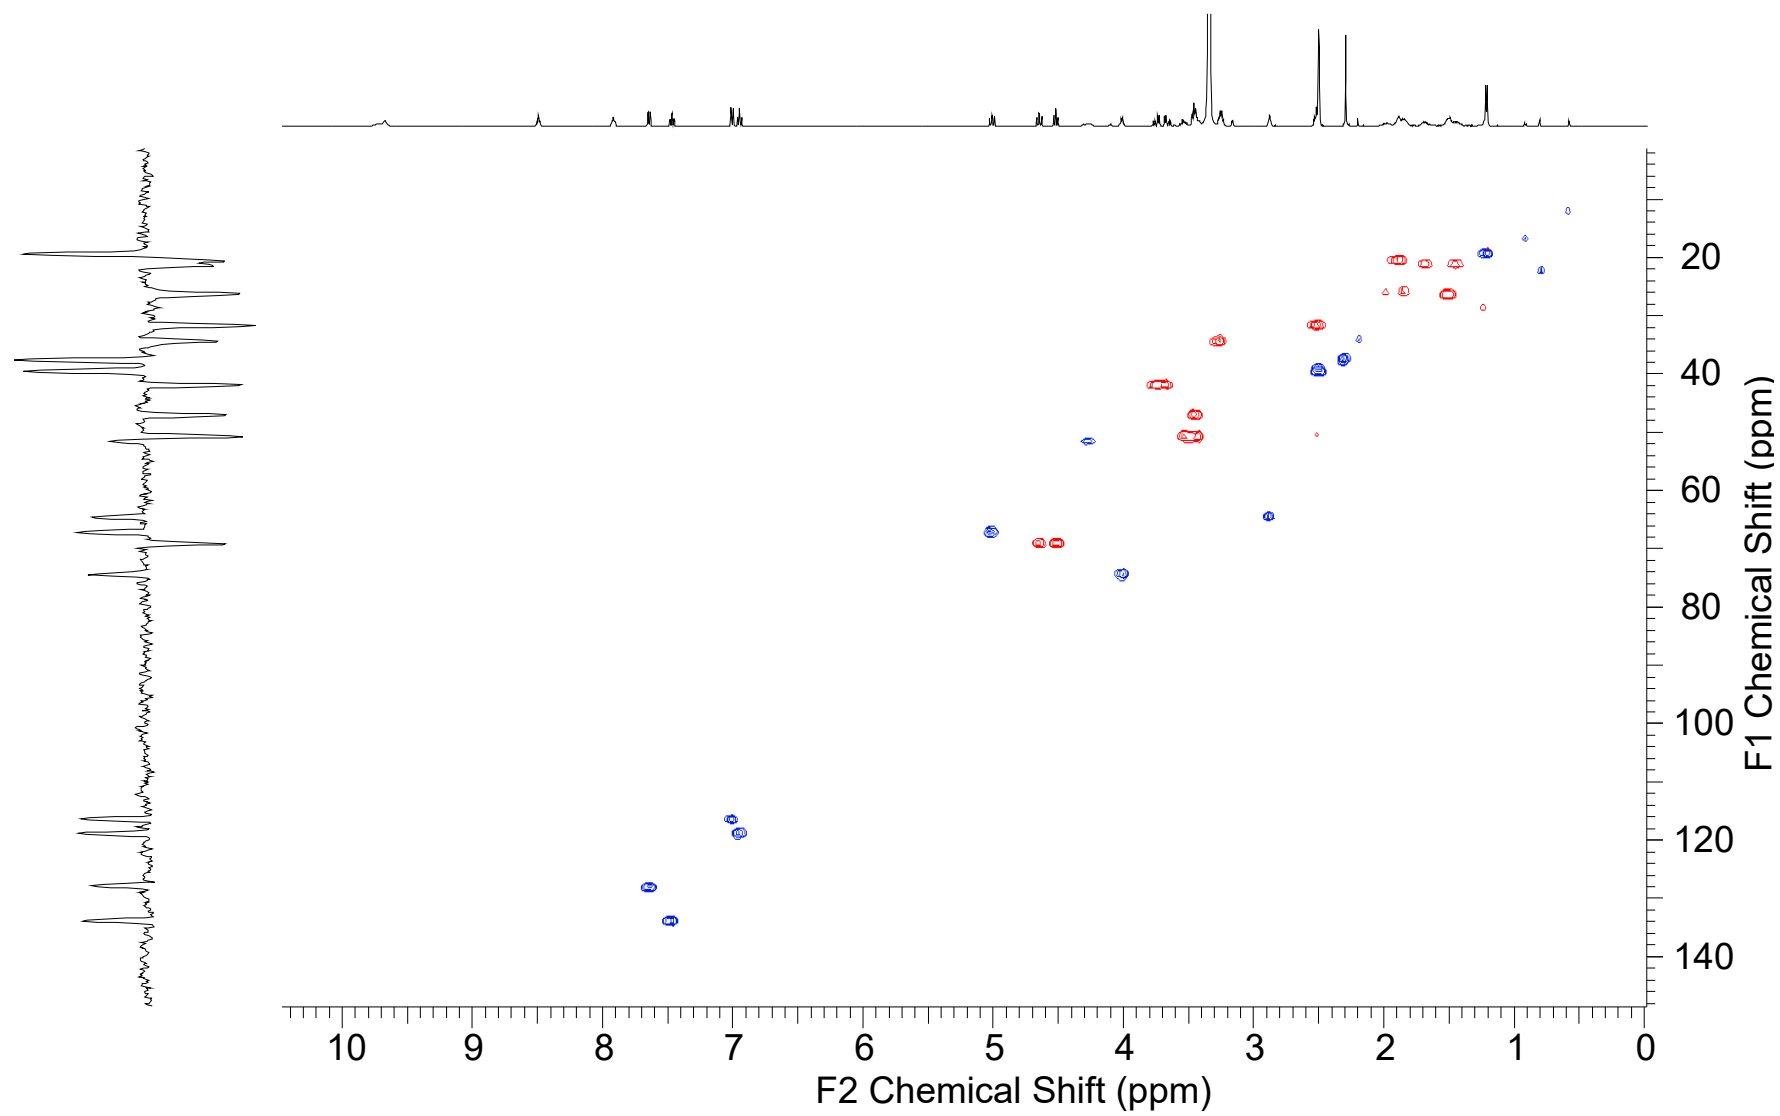

**Figure S32.** HSQC (dimethyl sulfoxide-*d*<sub>6</sub>) spectrum of madurastatin D1 (4).

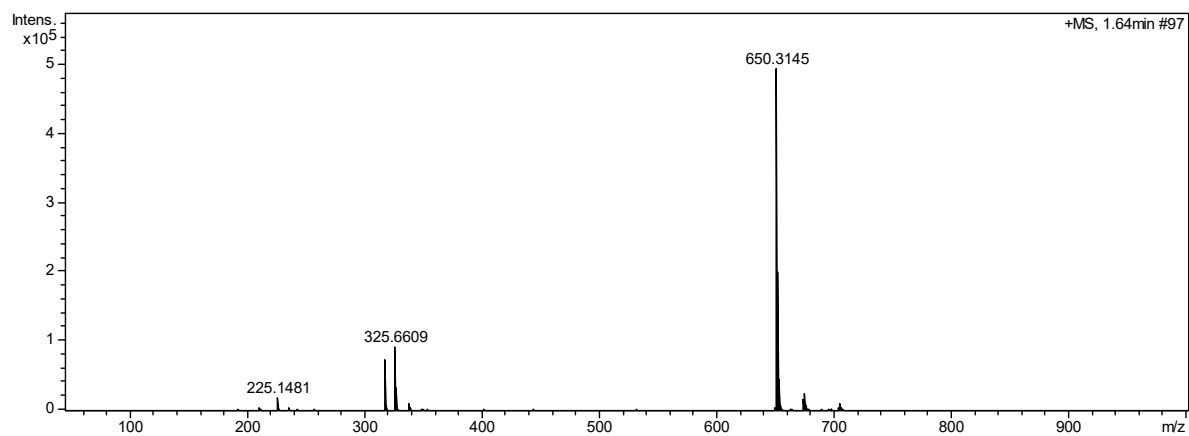

**Figure S33.** HRMS spectrum of madurastatin H2 (2).

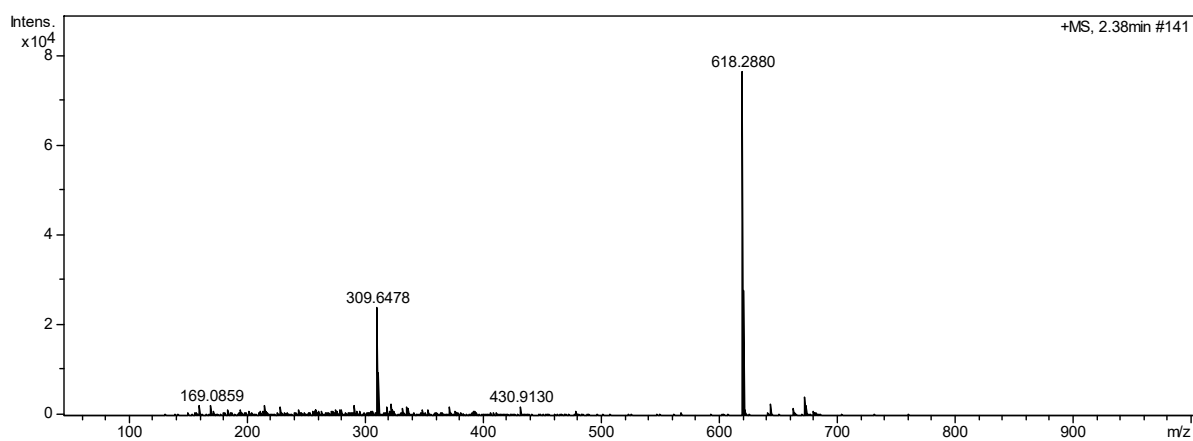

**Figure S34.** HRMS spectrum of 33-*epi*-madurastatin D1 (3).
